# Supplementary material for: How the reduction of working hours could influence health outcomes: a systematic review of published studies
Source: PubMed Central journal article supplement — BMJ Open. 2022 Apr 1;12(4):e051131. doi: 10.1136/bmjopen-2021-051131 (PMC8977802; doi:10.1136/bmjopen-2021-051131), 2022-04-01
Supplement: bmjopen-2021-051131.draft_revisions.pdf [file bmjopen-2021-051131.draft_revisions.pdf]

# BMJ Open

BMJ Open is committed to open peer review. As part of this commitment we make the peer review history of every article we publish publicly available.

When an article is published we post the peer reviewers' comments and the authors' responses online. We also post the versions of the paper that were used during peer review. These are the versions that the peer review comments apply to.

The versions of the paper that follow are the versions that were submitted during the peer review process. They are not the versions of record or the final published versions. They should not be cited or distributed as the published version of this manuscript.

BMJ Open is an open access journal and the full, final, typeset and author-corrected version of record of the manuscript is available on our site with no access controls, subscription charges or pay-per-view fees (<http://bmjopen.bmj.com>).

If you have any questions on BMJ Open's open peer review process please email [info.bmjopen@bmj.com](mailto:info.bmjopen@bmj.com)

# BMJ Open

## How the reduction of working hours could influence health outcomes: a review of published studies

|                               |                                                                                                                                                                                                                                                                                                                                                                                                                                                                                                                                                                                                                                                                                                                                                |
|-------------------------------|------------------------------------------------------------------------------------------------------------------------------------------------------------------------------------------------------------------------------------------------------------------------------------------------------------------------------------------------------------------------------------------------------------------------------------------------------------------------------------------------------------------------------------------------------------------------------------------------------------------------------------------------------------------------------------------------------------------------------------------------|
| Journal:                      | <i>BMJ Open</i>                                                                                                                                                                                                                                                                                                                                                                                                                                                                                                                                                                                                                                                                                                                                |
| Manuscript ID                 | bmjopen-2021-051131                                                                                                                                                                                                                                                                                                                                                                                                                                                                                                                                                                                                                                                                                                                            |
| Article Type:                 | Original research                                                                                                                                                                                                                                                                                                                                                                                                                                                                                                                                                                                                                                                                                                                              |
| Date Submitted by the Author: | 16-Mar-2021                                                                                                                                                                                                                                                                                                                                                                                                                                                                                                                                                                                                                                                                                                                                    |
| Complete List of Authors:     | Voglino, Gianluca; University of Turin, Department of Public Health<br>Savatteri, Armando; University of Turin, Department of Public Health and Paediatric Sciences<br>Gualano, Maria; University of Turin, Department of Public Health and Paediatric Sciences<br>Catozzi, Dario; University of Turin, Department of Public Health<br>Rousset, Stefano; University of Turin, Department of Public Health and Paediatric Sciences<br>Boietti, Edoardo; University of Turin, Department of Public Health and Paediatric Sciences<br>Bert, Fabrizio; University of Turin, Department of Public Health; University Hospital City of Science and Health Turin<br>Siliquini, Roberta; Università degli Studi di Torino, Department of Public Health |
| Keywords:                     | OCCUPATIONAL & INDUSTRIAL MEDICINE, PUBLIC HEALTH, Health & safety < HEALTH SERVICES ADMINISTRATION & MANAGEMENT                                                                                                                                                                                                                                                                                                                                                                                                                                                                                                                                                                                                                               |
|                               |                                                                                                                                                                                                                                                                                                                                                                                                                                                                                                                                                                                                                                                                                                                                                |

SCHOLARONE™  
Manuscripts

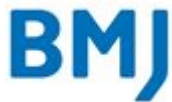

I, the Submitting Author has the right to grant and does grant on behalf of all authors of the Work (as defined in the below author licence), an exclusive licence and/or a non-exclusive licence for contributions from authors who are: i) UK Crown employees; ii) where BMJ has agreed a CC-BY licence shall apply, and/or iii) in accordance with the terms applicable for US Federal Government officers or employees acting as part of their official duties; on a worldwide, perpetual, irrevocable, royalty-free basis to BMJ Publishing Group Ltd ("BMJ") its licensees and where the relevant Journal is co-owned by BMJ to the co-owners of the Journal, to publish the Work in this journal and any other BMJ products and to exploit all rights, as set out in our [licence](#).

The Submitting Author accepts and understands that any supply made under these terms is made by BMJ to the Submitting Author unless you are acting as an employee on behalf of your employer or a postgraduate student of an affiliated institution which is paying any applicable article publishing charge ("APC") for Open Access articles. Where the Submitting Author wishes to make the Work available on an Open Access basis (and intends to pay the relevant APC), the terms of reuse of such Open Access shall be governed by a Creative Commons licence – details of these licences and which [Creative Commons](#) licence will apply to this Work are set out in our licence referred to above.

Other than as permitted in any relevant BMJ Author's Self Archiving Policies, I confirm this Work has not been accepted for publication elsewhere, is not being considered for publication elsewhere and does not duplicate material already published. I confirm all authors consent to publication of this Work and authorise the granting of this licence.

1  
2  
3  
4  
5  
6  
7  
8  
9  
10  
11  
12  
13  
14  
15  
16  
17  
18  
19  
20  
21  
22  
23  
24  
25  
26  
27  
28  
29  
30  
31  
32  
33  
34  
35  
36  
37  
38  
39  
40  
41  
42  
43  
44  
45  
46  
47  
48  
49  
50  
51  
52  
53  
54  
55  
56  
57  
58  
59  
60

**Title page****Title:**

How the reduction of working hours could influence health outcomes: a review of published studies

**Authors:**

Gianluca Voglino<sup>1</sup>, Armando Savatteri<sup>1</sup>, Maria Rosaria Gualano<sup>1</sup>, Dario Catozzi<sup>1</sup>, Stefano Rousset<sup>1</sup>, Edoardo Boietti<sup>1</sup>,  
Fabrizio Bert<sup>1</sup>, Roberta Siliquini<sup>1,2</sup>

<sup>1</sup>Department of Public Health and Paediatric Sciences, University of Turin, Torino, Italy.

<sup>2</sup>A.O.U. City of Health and Science of Turin, Turin, Italy.

**Corresponding author:**

Maria Rosaria Gualano, Via Santena 5 bis, 10126, Turin, Italy

Email: mariarosaria.gualano@unito.it

**Word count:** 4483

## ABSTRACT

### Objectives

The health effects of worktime arrangements have been largely studied for long working hours, whereas a lack of knowledge remains regarding the potential health impact of reduced worktime interventions. Therefore, we conducted this review in order to assess the relationships between worktime reduction and health.

### Methods

Our review followed the PRISMA statement. We considered papers exploring the relationship between worktime reduction with preserved salary and several health outcomes.

### Results

We selected 7 studies, all with a longitudinal design. Results showed a positive relationship between reduced work hours and working life quality, sleep, stress and certain general symptoms, such as cardiovascular and musculoskeletal ones.

### Conclusions

Taken together these findings suggest that reducing worktime while retaining salary is a promising workplace intervention that should be taken into consideration to improve employees' well-being.

**Keywords:** working hours; well-being; reducing worktime; working life quality

### Strengths and limitations of this study

- This review identified a positive relationship between reduced work hours with preserved salary and without an increase in total workload and working life quality, sleep, stress and some general symptoms.
- These findings could encourage companies and policy makers to reduce working hours and preserve workers' health.
- Due to scarcity of studies investigating the reduction of work hours, only few relevant studies were found and some of the review findings were inconclusive
- The current state of the art in how individuals would benefit from work hours reduction is still poor and further studies are needed to address this issue, especially if such work arrangement keeps employees' productivity unchanged for a possible reduction in sick days.

## INTRODUCTION

In Organization for Economic Cooperation and Development (OECD) countries the average working week consists of 37 hours<sup>1</sup>. OECD Data on annual average working hours show that, despite a declining trend in the amount of worked hours, many Countries still exceed the standard<sup>2</sup>. Working long hours is widely recognized as detrimental for employees' health. Indeed, several studies investigating the health effects of working overtime reported concerning findings, including increased risk of stroke, coronary heart disease, anxiety, depression, sleep disorders and adverse pregnancy outcomes in women<sup>3-5</sup>. Furthermore, a systematic assessment of evidence in literature with meta-analyses conducted by Rivera et al. found moderate-grade evidence linking long work-hours with stroke and low-grade evidence on the association between

1  
2  
3 long work-hours with coronary disease, depression and pregnancy complications, including low birth weight babies and  
4 preterm delivery<sup>6</sup>. Long working hours have also been associated with reduced levels of work-life balance and increased  
5 work-family conflict<sup>7</sup>.

6 Conversely, the effects of reduced work-hours have not been extensively examined as for long work-hours so far. Indeed,  
7 several experiments of reducing working time have been conducted throughout the years, both in the public and private  
8 sector. One of the most notable examples was the adoption of the “35-hour Workweek” between 1998 and 2000 by the  
9 French Government, which allowed the reduction of weekly working hours from 39 to 35, with the aim of fighting the  
10 high unemployment rates. However, aside from two surveys examining employees’ satisfaction with modified work-  
11 hours and their work-family conflict, no other impacts on health and well-being have been evaluated<sup>8,9</sup>. The authors argue  
12 that the French 35-hours law increased overall dissatisfaction with modified work hours among employees, mainly  
13 because it did not take into account the heterogeneity of work organization. It appears that employees increased workload  
14 to maintain high productivity. Indeed, reducing working time without employing extra-personnel may compromise the  
15 fine balance between job demand and resources, which in turn would undermine employees’ wellbeing<sup>10</sup>. Further  
16 interventions have been carried out on a company level. In Germany, Volkswagen reduced the working week from 36 to  
17 28.8 hours<sup>11</sup> and more recently, Microsoft Japan tested a four-days work week<sup>12</sup>. Similarly, Perpetual Guardian, a New  
18 Zealand firm operating in the management of trusts, wills and estates, ran a four-day work week trial for all its 240  
19 employees<sup>13</sup>. Although companies reported successful results, they did not take into consideration the potential health  
20 impact of these experiences.

21 Besides, there are few studies even in scientific literature that investigate the role of reduced work hours on workers’  
22 health. To our knowledge, only one literature review was conducted in 2005 and authors concluded that no relevant effects  
23 on health were observed<sup>14</sup>. However, the review was published in Swedish, hence it may represent an issue due to  
24 language barriers. Furthermore, the studies included in their work were mostly reports from Swedish ministerial  
25 committees and critical reviews on work time arrangements. Indeed, in the studies published before 2000 authors were  
26 primarily interested in the economic consequences of reducing work-hours, exploring the feasibility of the project, and  
27 little attention was paid to the effects of worktime reduction on the health of employees. Since 2000, several interventional  
28 studies have been published. Therefore, we decided to conduct a review of the literature examining studies focusing on  
29 the relationship between reduced working hours and health effects, published since 2000, in which employees retained  
30 their salary and proportionally decreased their work time and workload.

## 31 **METHODS**

### 32 **Search strategy**

33 Following the Preferred Reporting Items for Systematic Reviews and Meta-Analyses (PRISMA) checklist we carried out  
34 a literature search for articles published in Medline, PsycInfo, Embase and Web of Science databases from January 2000  
35 up to November 2019. Search terms included terms like “work”, “health”, “well-being”, “mental-health”, “worktime  
36 reduction”, “reduced work hours”. Full search strings for each database are provided in supplemental file 1. First,  
37 duplicates were excluded. Next, AS, DC, EB and GV independently screened retrieved sources by title and abstract  
38 following inclusion criteria. The same authors, always in an independent fashion, performed a full text review. Finally,  
39 consensus was reached through discussion about uncertain cases between all reviewers. Authors chose Rayyan QCRI as  
40 a tool for selecting and extracting relevant<sup>15</sup>.

### 41 **Inclusion and exclusion criteria**

42 We decided to include primary sources in any form, both interventional and observational studies, provided that  
43 quantitative analysis of any health-related outcome were performed. Hence, studies with qualitative research methods  
44 were excluded because we were interested on the effects of the interventions in terms of quantitatively measured  
45 outcomes. Articles had to investigate the association between reduced working time with retained salary and health  
46 effects, without excluding beforehand any category of workers. No salary reduction was considered crucial in order to  
47 avoid a selection bias possibly leading to exclude low-income workers. Another inclusion criterion was the replacement  
48 of working activity with any workplace-based intervention, provided that the amount of work hours was effectively  
49 reduced. Conversely, studies specifically focused on worktime reduction policies regarding activities with excessively  
50 long working hours, such as medical residency, were not consistent with the concept of reduced working hours and  
51 retained salary and were therefore excluded from our work. No language restriction was set. Due to the heterogeneity in  
52 the outcomes evaluated by the studies selected, a meta-analysis of data could not be conducted. Data and information  
53 regarding study design, Country, participant characteristics, observation period, intervention description, outcomes  
54 measured and results were extracted and synthesised in a literature review.

### 55 **Patient and Public Involvement**

56 No patients were involved in this study.  
57  
58  
59  
60

## RESULTS

As results of the bibliographic search, a total of 3876 published articles were identified (**Figure 1**).

**Figure 1** Systematic review: selection process. From: Moher D, Liberati A, Tetzlaff J, Altman DG, The PRISMA Group (2009). Preferred Reporting Items for Systematic Reviews and Meta- Analyses: The PRISMA Statement. PLoS Med 6(7): e1000097. doi:10.1371/journal.pmed1000097.

Duplicates were excluded and remaining 2456 records were reviewed. A full-text review was conducted on 40 articles. Finally, after evaluating the inclusion criteria, 7 articles were selected (1 article was originally added by citation chasing). In Total 7 articles, with a longitudinal interventional design, were included in the final analysis<sup>18-24</sup>. A brief summary of included articles is provided in **Table 1**.

**Table 1** Characteristics of the studies included in systematic review.

| Author                 | Study Design                    | Country & Participants                                                                                          | Observation period | Intervention description                                                                                                                                                                      | Outcome (measures)                                                                                                                                                                                                                                                                                        | Results                                                                                                                                                                                                                                                                                            |
|------------------------|---------------------------------|-----------------------------------------------------------------------------------------------------------------|--------------------|-----------------------------------------------------------------------------------------------------------------------------------------------------------------------------------------------|-----------------------------------------------------------------------------------------------------------------------------------------------------------------------------------------------------------------------------------------------------------------------------------------------------------|----------------------------------------------------------------------------------------------------------------------------------------------------------------------------------------------------------------------------------------------------------------------------------------------------|
| Akersredt et al, 2001  | Longitudinal intervention study | Sweden, N = 63, full-time workers in health care service.                                                       | 36 Months          | Intervention group (N=41): reduced WWH from 39 hrs/week to 30 hrs/week. Control group (N=22): unchanged working time.                                                                         | General symptoms, neuro-psychological symptoms, working life quality, quality of life, physical activity and sleep.                                                                                                                                                                                       | Subjective sleep quality (SSQ), mental fatigue and heart/respiratory symptoms, time for social activity, time for family and friends improved significantly more in the experimental group than in the control group. No significant effects at all for sickness absence or for self-rated health. |
| Wergeland et al, 2003  | Longitudinal intervention study | Norway and Sweden, N = 403. Workers in nursing homes, institution covering home care services and kindergartens | 12-22 Months       | Intervention group: reduced DWH to 6 hrs/day. Reference group: unchanged working time.                                                                                                        | Musculoskeletal disorders and working life quality (shoulder-neck and back pain frequency and work-related physical exhaustion)                                                                                                                                                                           | A significant interaction was found for neck-shoulder pain and for exhaustion after work 1 year after the work-hour reduction in the intervention group. No significant effects were observed in the reference group.                                                                              |
| von Thiele et al, 2008 | Longitudinal intervention study | Sweden, N = 177 employees from 6 workplaces at a public dental health care organization                         | 12 Months          | PE group: 2.5 hrs/week of physical activity instead of work time. Reduced work hours group: reduced WWH proportionally to the amount of time worked. Reference group: unchanged working time. | General symptoms, musculoskeletal disorders, working life quality (work-home interference, recovery from work and work ability), physical activity (overall physical activity and physical exercise) and biological markers (blood lipids, neuroendocrine markers, metabolic and cardiovascular measures) | Physical activity increased in all three groups. Decreased glucose and upper-extremity disorders were found in the exercise group, while increased HDL and waist-to-hip ratio was found among those working reduced hours. Participants working reduced hours                                      |

|                                |                                       |                                                                                         |           |                                                                                                                                                                                                     |                                                                                                                                                                                                                                                                                                                                                                                                              |                                                                                                                                                                                                                                                                                                                                                                                                               |
|--------------------------------|---------------------------------------|-----------------------------------------------------------------------------------------|-----------|-----------------------------------------------------------------------------------------------------------------------------------------------------------------------------------------------------|--------------------------------------------------------------------------------------------------------------------------------------------------------------------------------------------------------------------------------------------------------------------------------------------------------------------------------------------------------------------------------------------------------------|---------------------------------------------------------------------------------------------------------------------------------------------------------------------------------------------------------------------------------------------------------------------------------------------------------------------------------------------------------------------------------------------------------------|
|                                |                                       |                                                                                         |           |                                                                                                                                                                                                     |                                                                                                                                                                                                                                                                                                                                                                                                              | also had increased total cholesterol and no changes in LDL-to-HDL ratio.                                                                                                                                                                                                                                                                                                                                      |
| <b>von Thiele et al, 2011</b>  | Longitudinal intervention study       | Sweden, N = 177 employees from 6 workplaces at a public dental health care organization | 12 Months | PE group: 2.5 hrs/week of physical activity instead of work time.<br>Reduced work hours group: reduced WWH proportionally to the amount of time worked.<br>Reference group: unchanged working time. | On-the-job productivity, working life quality (sickness presenteeism and sickness absenteeism)<br>Objective production levels (administrative records)                                                                                                                                                                                                                                                       | Physical activity was associated with an increase in self-rated productivity in terms of increased quantity of work and work-ability and decreased frequency and number of days of sickness absence. No effect was found in the work hours reduction group. In all three groups there was an increase in the number of treated patients per therapist, significantly greater in the reduced work hours group. |
| <b>Barck-Holst et al, 2017</b> | Longitudinal quasi-experimental trial | Sweden, N= 204<br>A total of 125 participants were deemed as per protocol.              | 18 Months | Intervention group: reduced work hours by 25%.<br>Reference group: unchanged working time.                                                                                                          | Neuro-psychological symptoms (exhaustion syndrome, average stress level; stress, memory difficulties; negative emotion, fatigue and exhaustion), working life quality (demands, control, social support, instrumental manager support, instrumental coworker support, work intrusion on private life, private life intrusion on work) and sleep (restorative sleep, sleep quality and adequate sleep length) | Overall, the intervention group significantly improved restorative sleep, stress, memory difficulties, negative emotion, sleepiness, fatigue and exhaustion on both work days and weekends; sleep quality was improved on weekends. Moreover, improved demands, instrumental manager support and work intrusion on private life were observed in the intervention group.                                      |



|                             |                                            |                                                                |           |                                                                                                   |                                                                                                                                                                                                                                                                                                                                                                                                                          |                                                                                                                                                                                                                                                                                                                                                                                                                                                                                                                                                                                                                                                                                                                                                                                  |
|-----------------------------|--------------------------------------------|----------------------------------------------------------------|-----------|---------------------------------------------------------------------------------------------------|--------------------------------------------------------------------------------------------------------------------------------------------------------------------------------------------------------------------------------------------------------------------------------------------------------------------------------------------------------------------------------------------------------------------------|----------------------------------------------------------------------------------------------------------------------------------------------------------------------------------------------------------------------------------------------------------------------------------------------------------------------------------------------------------------------------------------------------------------------------------------------------------------------------------------------------------------------------------------------------------------------------------------------------------------------------------------------------------------------------------------------------------------------------------------------------------------------------------|
| <b>Lorentzon 2017</b>       | Longitudinal intervention study            | Sweden, N = 124, nurses working in a centre for the elderly    | 23 Months | Intervention group: work-time reduction to 6 hrs/day.<br>Reference group: unchanged working time. | General symptoms, musculoskeletal disorders (perceived health and eating habits), neuro-psychological symptoms (alertness level, perceived fatigue, energy left at home, feeling calm, perceived stress), working life quality (occupational health, collaboration and personal development between colleagues, sick leaves), physical activity (physical activity levels), sleep (average sleep time and sleep quality) | Health perceived as good (72% vs 60%), alertness level perceived as good (65% vs 50%), satisfactory level of perceived fatigue (+20% vs -22%), feeling having a lot of energy left when arriving at home (51% vs 7%), feeling calm (64% vs 45%), satisfactory levels of stress (+20%, -5%), average sleep time (7 hours in intervention group, 5.8 hours in control group). Satisfaction regarding physical activity increased. Healthy eating habits were virtually unchanged; general symptoms, sleep and symptoms affecting the musculoskeletal system improved in the intervention group, and dropped in the control group. Collaboration and personal development improved; improved sense of collaboration between nurses. Sick leave increased in the intervention group. |
| <b>Schiller et al, 2017</b> | Longitudinal controlled intervention study | Sweden, N=580, workers from 33 workplaces in the public sector | 18 Months | Intervention group: reduced WWH by 25%.<br>Reference group: unchanged working time.               | Sleep, perceived stress and worries                                                                                                                                                                                                                                                                                                                                                                                      | On workdays, the intervention group displayed improved SSQ, 23 minutes extended sleep duration, decreased sleepiness and perceived stress and less feelings of worries and stress at bedtime when work hours were reduced. Similarly, the intervention showed positive                                                                                                                                                                                                                                                                                                                                                                                                                                                                                                           |

effects on days off, except for sleep duration.

The included studies were published between 2001<sup>24</sup> and 2017<sup>18,19,23</sup> and they were performed in northern Europe<sup>18-24</sup>. The sample size ranged from 63 participants<sup>24</sup> to 580 workers<sup>19</sup>, mostly from healthcare settings<sup>20-24</sup>. Only one of the included studies enrolled workers from different workplaces in the public sector (Schiller et al. 2017). All the studies included had a longitudinal design and the observation period was between 12 months<sup>20-22</sup> and 23 months<sup>23</sup>. Although all the studies compared the intervention group to a control group with no work-time modifications, the intervention examined were different. In particular, two studies assessed a work-time reduction to 6 hours per day<sup>22,23</sup>, two studies evaluated a weekly work-time reduction of 25%<sup>18,19</sup>, two studies evaluated simultaneously a reduced weekly work-time reduction proportionally to the amount of time worked (reduced work hours group) and a 2.5 hours per week physical activity instead of work time program (physical exercise group)<sup>20,21</sup> and one study assessed a reduced weekly work-time reduction from 39 to 30 hours per week<sup>24</sup>. The included studies assessed a variety of different outcomes. In particular general symptoms<sup>20,23,24</sup>, neuro-psychological symptoms<sup>18,23,24</sup>, working life quality<sup>18,20-24</sup>, quality of life<sup>18,23,24</sup>, physical activity<sup>20,23,24</sup>, sleep<sup>18,19,23,24</sup>, musculoskeletal disorders<sup>20,22,23</sup> and biological markers<sup>20</sup> were assessed. In particular, Åkerstedt and colleagues performed a longitudinal cohort study in 5 different healthcare settings, in order to compare the effects of work-hours reduction among health care and day care nursery personnel. The study involved a total of 63 nurses, 41 in the experimental group, a 9 hours reduction of the working week from 39 hours per week to 30 hours, retaining full pay, and 22 in the control group. The experimental group showed a significant improvement for heart/respiratory symptoms, mental fatigue, sleep quality, time for social, time for family/friends, influence on work-hours and satisfaction with work-hours. Additionally, most of these variables also showed a significant change over time. Furthermore, there was a positive change over time for pain/ache complaints, nervous symptoms, gastrointestinal complaints, insomnia complaints, refreshed at awakening, sleepiness at work/leisure time, involuntary sleep at work and leisure time and satisfaction with the work situation. On the contrary, no significant interaction was found between reduced work hours and exercise, weight and BMI<sup>24</sup>.

Similar results were published by Barck-Holst and colleagues. They performed a longitudinal quasi experimental study involving seven public social service agencies. Employees in the intervention group reduced their work hours by 25% but retained their previous salary and their organizations were fully reimbursed and staff to compensate the loss of work hours was hired. After controlling for baseline values, gender and age, there was a significant difference in change over time between intervention and control group during workdays on the restorative sleep index, average stress level, the stress index, the memory difficulties index, the negative emotion index, average sleepiness and the fatigue and exhaustion index<sup>18</sup>.

In addition, a longitudinal controlled intervention study evaluating a 25% reduction of weekly work hours was published in 2017 by Schiller and colleagues. In this paper, participants worked at 33 different workplaces, in four sectors: social services (n=170); technical services (n=236); care and welfare (n=159); call-centre (n=71). The intervention group (n=370) reduced work-time to 75% with preserved salary during 18 months. Data were collected at baseline (1-2 months before the intervention) and approximately 9 months and 18 months after the introduction of reduced work hours. On workdays, the intervention group (N=354) displayed improved subjective sleep quality, 23 minutes extended sleep duration (over the whole period of 18 months), decreased sleepiness and perceived stress and less feelings of worries and stress at bedtime when work hours were reduced (P<0.002). Gender, age, having children living at home, and baseline values of sleep quality and worries and stress at bedtime, considered as additional between-group factors, did not influence the results significantly<sup>19</sup>.

Similar outcomes were assessed in a cohort study, performed between February 2015 and December 2016. In this paper, 68 nurses from the intervention group had their working time reduced to 6 hours per day with retaining their full-time pay. On the contrary, nurses in the control group (N=56) had no working hours reduction. Outcomes were assessed using several questionnaires before, during and after the experimentation. In particular, the sick leave was 6.1% in the intervention group and 12.3% in the control group. Furthermore, health perceived as good (72% vs 60%), alertness level perceived as good (65% vs 50%), satisfactory level of perceived fatigue (+20% vs -22%), feeling having a lot of energy left when arriving at home (51% vs 7%, both starting from 20%), feeling calm (64% vs 45%), satisfactory levels of stress (+20%, -5%), average sleep time (7 hours vs 5.8 hours) had better values in the intervention group compared to the control group. Additionally, in the intervention group, satisfaction regarding physical activity increased (+7% vs -15%). Finally, general symptoms, sleep and symptoms affecting the musculoskeletal system improved in the intervention group, and dropped for the control group<sup>23</sup>.

Similarly, a previous paper assessing the occurrence of musculoskeletal disorders in the experimental and control groups was published by Wegerland and colleagues. In their longitudinal intervention study, involving subjects enrolled from different institutions, workers in the experimental group had their daily work-hours reduced to 6 hours, with retained salary and extra personnel employed to compensate for the reduction in work-hours. Participants were involved through a self-administered questionnaire about pain in the neck-shoulder and back regions prior to and during the work-time reduction. By using a multivariable analysis on data from all the institutions, authors found a significant interaction for

neck-shoulder pain ( $p=0.034$ ) and exhaustion after work ( $P=0.009$ ). No significant interaction was found for back pain. Additionally, the intervention group showed increased job satisfaction after the reduction in work-hours<sup>22</sup>.

Finally, von Thiele and colleagues performed two longitudinal studies in Stockholm, Sweden, involving employees from six workplaces in a large public dental health care organization, randomly allocated to one of three groups: physical-exercise group (PE), reduced work-hours group (RWH), and reference group (R). At the two workplaces acting as reference, no intervention was carried out; at the two workplaces in the PE group, 2.5 hours of weekly work hours were allocated to mandatory physical exercise on two different days; at the two workplaces in the RWH group, full-time weekly hours were reduced from 40 hours/week to 37.5 hours/week. All employees in the intervention groups retained their salaries, and no additional personnel were employed. The final sample consisted of 177 employees, mainly women. Participants were instructed to complete self-ratings at baseline, after 6 months and after 12 months<sup>20,21</sup>.

In the paper published in 2008<sup>20</sup> blood samples were and questionnaire were used to explore the areas of physical activity, recovery from work stress, work-home interference, self-related health, work ability, general and musculoskeletal symptoms. The results showed a significant increase in physical exercise in all three groups over time, with post-hoc tests showed that the increase in the PE group was significantly greater than in the other two groups. Additionally, the analysis showed increasing levels of all of the blood lipids in the reference group ( $p<0.001$ , for total cholesterol;  $p=0.016$ , for triglycerides;  $p=0.003$ , for HDL;  $p<0.001$ , for LDL). In the RWH group, total cholesterol and HDL had increased significantly ( $p=0.019$ , for total cholesterol;  $p=0.016$ , for HDL), while only total cholesterol had increased significantly in the physical-exercise group ( $p=0.018$ ). Glucose showed a significant time  $\times$  group effect ( $p=0.04$ ), and a significant decrease in the PE group ( $p=0.036$ ). Work ability decreased in the reference group ( $p=0.005$ ); similar results were found for general symptoms<sup>20</sup>.

In the paper published in 2011<sup>21</sup>, three outcomes were measured: on-the-job productivity, measured with a single item asking the respondents to rate their current work ability as compared with their individual best work ability on a ten-point scale; sickness presenteeism and sickness absenteeism, assessed with three questions; objective production levels, in terms of the number of treated patients and the number of therapists per month for each participating worksite as well as for all worksites combined. The results showed a significant increase in self-rated quantity of work ( $p = 0.029$ ) and work ability ( $p = 0.046$ ) in the PE group. Work ability decreased significantly in the reference group ( $p = 0.004$ ). In the PE group, frequency of sickness absence ( $p = 0.037$ ) and sickness duration ( $p = 0.029$ ) decreased significantly. In the reference group changes in sickness absence duration ( $p = 0.041$ ) and sickness presenteeism ( $p=0.028$ ) were each significant<sup>21</sup>.

#### Quality assessment

The quality of the included studies was assessed using the "Quality Assessment Tool for Quantitative Studies" developed by the Effective Public Health Practice Project (EPHPP)<sup>16</sup>. This quality appraisal tool provides a standardized means to assess study quality and develop recommendations for study findings considering eight components of study methodology: selection bias, study design, presence of confounders, blinding of participants and outcome assessors, validity and reliability of data collection methods and study dropouts and withdrawals. The overall quality of each study is then expressed as weak, moderate or strong. Previous evaluation of the tool has shown it to be valid and reliable<sup>17</sup>. Two reviewers, namely AS and SR, independently performed quality assessment. Discrepancies between the reviewers, such as differences in interpretation of criteria and studies, were resolved by discussion in order to reach consensus. The overall quality was found to be strong for three studies, moderate for one study and weak for three studies.

## DISCUSSION

The purpose of this review was to analyze the results of studies conducted in order to explore the consequences of work time reduction on health outcomes, which is an emerging and debated issue especially in western countries with a developed welfare system, as the ones in Northern Europe. We analysed 7 published articles exploring several different outcomes, and all of them were investigated and discussed.

### General and physical symptoms

Four longitudinal studies analysed the relationship between work-time reduction and a broad spectrum of general and physical symptoms. Åkerstedt et al.<sup>24</sup> found a significant improvement of hearth/respiratory symptoms in the experimental group compared to the control group. However, when self-rated health was explored as an outcome, they did not find any statistically significant differences before and after the intervention, neither between the experimental and the control group, nor over time among the same group. Similar results were obtained by von Thiele et al., which did not find any significant differences between the intervention and the reference group regarding neither general symptoms nor self-rated health<sup>20</sup>. As the Authors suggest, the lack of significant results could be explained by the fact that the study was carried out on healthy subjects, consequently reducing the effect size, especially for self-ratings. On the other hand, Lorentzon et al. found an improvement in perceived health in the intervention group compared to the control group<sup>23</sup>. Wergeland et al., in their three-project study, found a significant reduction of neck/shoulder and back pain prevalence in the intervention group<sup>22</sup>, in agreement with Lorentzon et al.<sup>23</sup>, possibly due to a reduction of time spent in the sitting position during work-time.

Data are still contradictory and it is possible to hypothesize that the real impact of workload reduction on general and physical symptoms, despite having a possible effect on specific physical symptoms, remains to be determined through further larger studies.

### Neuro-psychological symptoms

Four studies evaluated the relationship between work-time reduction and neuro-psychological symptoms<sup>18,19,23,24</sup>. General stress was the most frequently explored outcome. Barck-Holst et al. found an average stress level and a stress index significantly decreased in the intervention group, but this difference was higher on workdays compared to weekends<sup>18</sup>. This is consistent with the results of Schiller et al., who found a significant reduction of stress both during the day and at bedtime in the intervention group<sup>19</sup>. Lorentzon et al. found that workers with reduced work-time reported satisfactory levels of stress and perceived fatigue more often in comparison with workers in the control group<sup>23</sup>. Åkerstedt et al. found a significant reduction of mental fatigue in the experimental group. In addition, they found a reduction of nervous symptoms and pain/ache complaints over time, but this difference was not significant between the experimental and the control group. As the authors suggest, the project in itself may have increased the awareness of work organization and health, with positive effects on both groups<sup>24</sup>.

Globally, these results suggest that the reduction of work-time is associated with a significant improvement of stress and other neuro-psychological symptoms, probably due to the decrease of workload and the consequent increase of free time for leisure activities.

### **Sleep**

Sleep condition was evaluated in five studies<sup>18-20,23,24</sup>. Åkerstedt et al. and Schiller et al. measured subjective sleep quality (SSQ) using the same items and improvements were observed significantly more in the intervention group than in the reference group<sup>19,24</sup>. Similar results were reported by Barck-Holst et al.<sup>18</sup>. In their study on nurses, Lorentzon et al. found that those nurses working less hours as a part of the experiment averagely slept more than nurses who kept working with regular hours<sup>23</sup>. von Tiele et al. evaluated the presence of sleep disturbances as part of a more comprehensive questionnaire - a modified version of QPSNordic - investigating general symptoms<sup>20,25</sup>. Although they found no improvements in the experimental group regarding general symptoms, we cannot tell whether the occurrence of sleep disturbances taken alone differed among their participants. Despite different measurements being adopted, almost all studies found a significant improvement in sleep among intervention groups compared to control groups. As already reported by previous research, long working hours have shown to negatively influence sleep in many ways<sup>26,27</sup> and this effect may be explained by higher work demands and work-related stress<sup>28</sup>. Thus, we hypothesize that the positive effects of reduced work-time on stress and workload may explain the positive effects on sleep.

### **Quality of working life**

All studies except one investigated whether reduced work hours had measurable effects on working life quality<sup>18-20,22-24</sup>. Åkerstedt et al. found no effects on work demands, but workload had decreased for both intervention and control group. As hypothesized by the authors, it is possible that an increased awareness of work organization following the experiment may be the cause of such findings<sup>24</sup>. No effects on sickness absence were found, as opposed to von Tiele et al., where employees in the intervention group decreased frequency and number of days of sickness absence, as well as perceiving improved self-rated work ability<sup>20</sup>. Other work-related factors were reported as significantly improved after the experiment, including exhaustion after work, sense of collaboration between colleagues, demands, instrumental manager support and work intrusion on private life<sup>18,22,23</sup>. The last finding is in line with results from Anntila et al., in which shorter working hours were associated with positive work-family interaction<sup>29</sup>. Overall, reduced working hours seem to improve working-life quality.

### **Quality of life**

Three studies evaluated the effect of work-time reduction on quality of life outside of work<sup>20,23,24</sup>. Åkerstedt et al. found a significant increase in time for family/friends and social activities in the experimental group, and this increase was significant also over time among the experimental group<sup>24</sup>. However, as mentioned above, they did not find any improvement in the self-rated health. It is possible that the extra free time, despite exerting a positive effect on general quality of life, does not necessarily determine an improvement in self-perceived health. These results are consistent with the results of von Thiele et al., who did not find any significant differences regarding work-time interaction, neither between the intervention groups and the reference group nor over time among the same groups<sup>20</sup>. In addition, Lorentzon et al. found that healthy behaviours, such as healthy eating, did not improve in the intervention group<sup>23</sup>. Overall, these results suggest that work time reduction per se is not necessarily associated with an improvement in the balance between work and private life. Hence, beside work-time reduction, it is also important to focus on how the extra free time is spent, in order to make the reduction in work-time and workload really effective in exerting positive effects on individual health.

### **Physical activity**

Physical activity was evaluated by three studies<sup>20,23,24</sup>. While Åkerstedt et al. found no significant improvements regarding physical exercise<sup>24</sup>, von Thiele et al. and Lorentzon et al. observed an increase in physical activity in participants experimenting reduced work hours<sup>20,23</sup>. However, the study design by von Thiele et al. consisted in three groups (physical activity group, reduced work hours group and reference group) and such increases were observed in all of them<sup>20</sup>. We do not know whether these changes were a consequence of an increased awareness towards physical exercise brought by the experiment. Moreover, the number of studies evaluating this specific outcome are too few. Although previous research has shown that there seems to be an inverse association between work hours and physical activity<sup>30</sup>, for the reasons listed above it cannot be concluded that reduced work hours are associated with increased levels of physical activity. Indeed, we do not know whether employees working for reduced work time would engage their spare time into physical exercise. Hence, more experiments are needed to better determine this subject.

### **Biological markers**

1  
2  
3 Only von Thiele et al. evaluated the effect of work-time reduction on several biological markers<sup>20</sup>. They found in the  
4 reference group increasing levels of all of the blood lipids. In the reduced work hours group, total cholesterol and HDL  
5 had increased significantly, while only total cholesterol had increased significantly in the physical-exercise group.  
6 Regarding metabolic measures, glucose showed a significant decrease in the physical-exercise group only, while the  
7 waist-to-hip ratio increased in the reduced work hours group. These last findings suggest that the work time reduction  
8 alone is not sufficient to exert positive metabolic effects, but it should be associated with other healthy habits in the extra  
9 free time outside of work, like physical activity. that. On the other hand, in this study the increase of total cholesterol in  
10 the exercise group, without any significant reduction in LDL and waist-to-hip ratio, is unexpected and it could be related  
11 to other factors, such as diet, which this study did not analyze. Hence, it is impossible to state that a reduction in work  
12 hours has a significant and positive effect on biomarkers and metabolic outcomes, and other studies are therefore  
13 necessary to clarify these discrepancies.

#### 14 **Strengths and limitations**

15 To date, this is the first literature review carried out in English to establish the relationship between reduced work hours  
16 and health effects. Furthermore, our review evaluates the effect of reduced working hours on both self-reported and  
17 measured health outcomes. Nevertheless, it has some limitations that must be acknowledged. First of all, the studies we  
18 included in our analysis were published in Scandinavian countries, traditionally known for placing a high value on work-  
19 life balance. Hence, the results of this review are not easily generalizable in other contexts, which could be different from  
20 a social, cultural and economic point of view. Furthermore, even taking into account excluded records, few studies  
21 addressed the issue of work time reduction, suggesting that, despite emerging as a relevant topic in public debate over the  
22 last few years, the issue of worktime reduction has not been studied enough so far. However, we could have missed some  
23 relevant studies, due to language limitations. In addition, three out of seven studies were evaluated as of weak quality by  
24 the authors. The main reason for this was the impossibility to ensure blinding of both participants and outcome assessors  
25 in this kind of studies. Nonetheless all of them had a longitudinal design, over a period of time ranging from 12 up to 36  
26 months. Furthermore, in all studies except two, employment of extra-personnel allowed to prevent a compensatory  
27 increase in workload, which could have significantly undermined the effectiveness of worktime reduction.

#### 28 **CONCLUSIONS**

29 Our review shows that the reduction of work hours is associated with an improvement of sleep habits, lower levels of  
30 stress and better working life quality. Despite a positive effect on certain general symptoms, such as cardiovascular and  
31 musculoskeletal ones, it is unclear whether work time reduction really determines an improvement in general health  
32 outcomes, such as self-perceived health and well-being. Furthermore, only one study evaluated biological markers as a  
33 quantitative outcome, with contrasting results. In addition, from the studies included in this review did not emerge a  
34 positive influence of work time reduction neither on quality of life outside of work, nor on physical activity. Hence, we  
35 can conclude that a reduction of work-hours, with preserved salary and without an increase in total workload, can exert a  
36 positive effect on specific health outcomes, especially stress and sleep, but it is also essential to understand how the extra  
37 free time is spent. So, further studies are needed to investigate whether providing prescriptions on how to spend extra free  
38 time healthily can improve workers' health. The conflicting results of this review suggest that work time reduction can be  
39 truly effective only if it determines a parallel improvement in healthy habits, which can then be main responsible for a  
40 real increase of overall health and quality of life.

#### 41 **Contributors**

42 MRG and GV contributed to conceptualize and develop the study design. EB and AS built the search string and GV, DC,  
43 AS and EB contributed to articles screening, data extraction and data synthesis. AS and SR assessed the quality of the  
44 included articles and all authors contributed to drafting and revising the manuscript.

#### 45 **Competing interests**

46 The authors declare that they have no conflict of interest

#### 47 **Funding**

48 This research did not receive any specific grant from funding agencies in the public commercial or not-for-profit sectors.

#### 49 **Data availability statement**

50 Extra data, such as search strings, is available by emailing [armando.savatteri@unito.it](mailto:armando.savatteri@unito.it)

#### 51 **REFERENCES**

- 52  
53  
54  
55  
56  
57 1. OECD. Average usual weekly hours worked on the main job. OECD Employment and Labour Market Statistics  
58 (database). Published 2021. Accessed January 26, 2020.  
59 [https://stats.oecd.org/Index.aspx?DataSetCode=AVE\\_HRS](https://stats.oecd.org/Index.aspx?DataSetCode=AVE_HRS)  
60 2. OECD. Average annual hours actually worked per worker. OECD Employment and Labour Market Statistics  
(database). Published 2021. Accessed January 26, 2021.

- https://stats.oecd.org/Index.aspx?DataSetCode=ANHRS
3. Bannai A, Tamakoshi A. The association between long working hours and health: A systematic review of epidemiological evidence. *Scand J Work Environ Heal*. 2014;40(1):5-18. doi:10.5271/sjweh.3388
  4. Kivimäki M, Jokela M, Nyberg ST, et al. Long working hours and risk of coronary heart disease and stroke: A systematic review and meta-analysis of published and unpublished data for 603 838 individuals. *Lancet*. 2015;386(10005):1739-1746. doi:10.1016/S0140-6736(15)60295-1
  5. Virtanen M, Jokela M, Madsen IEH, et al. Long working hours and depressive symptoms: Systematic review and meta-analysis of published studies and unpublished individual participant data. *Scand J Work Environ Heal*. 2018;44(3):239-250. doi:10.5271/sjweh.3712
  6. Rivera AS, Akanbi M, O'Dwyer LC, McHugh M. Shift work and long work hours and their association with chronic health conditions: A systematic review of systematic reviews with meta-analyses. *PLoS One*. 2020;15(4):1-19. doi:10.1371/journal.pone.0231037
  7. Fagan C, Lyonette C, Smith M, Saldaña-Tejeda A. *The Influence of Working Time Arrangements on Work-Life Integration or 'Balance': A Review of the International Evidence.*; 2012.
  8. Estevao M, Sa F. The 35-Hour Workweek in France: Straightjacket or Welfare Improvement? *Econ Policy*. 2008;23. doi:10.1111/j.1468-0327.2008.00204.x
  9. Fagnani J, Letablier MT. Work and family life balance: The impact of the 35-hour laws in France. *Work Employ Soc*. 2004;18(3):551-572. doi:10.1177/0950017004045550
  10. Bakker AB, Demerouti E. The Job Demands-Resources model: state of the art. *J Manag Psychol*. 2007;22(3):309-328. doi:10.1108/02683940710733115
  11. Ferdinand P. VW Plan For 4-Day Workweek Is Adopted. *New York Times*. Published online 1993. <https://www.nytimes.com/1993/11/26/business/vw-plan-for-4day-workweek-is-adopted.html>
  12. Paul K. Microsoft Japan tested a four-day work week and productivity jumped by 40%. *The Guardian*. <https://www.theguardian.com/technology/2019/nov/04/microsoft-japan-four-day-work-week-productivity>. Published 2019.
  13. Charlotte G-M. A 4-Day Workweek? A Test Run Shows a Surprising Result. *New York Times*. <https://www.nytimes.com/2018/07/19/world/asia/four-day-workweek-new-zealand.html>. Published 2018.
  14. Brynja O, Bildt C. Arbetstidsförkortning och hälsa: En litteraturgenomgång av befintlig forskning [Reduced working hours and health: a literature review of existing studies]. Published online 2005. [http://nile.lub.lu.se/arbarch/arb/2005/arb2005\\_11.pdf](http://nile.lub.lu.se/arbarch/arb/2005/arb2005_11.pdf)
  15. Ouzzani M, Hammady H, Fedorowicz Z, Elmagarmid A. Rayyan—a web and mobile app for systematic reviews. *Syst Rev*. 2016;5(1):210. doi:10.1186/s13643-016-0384-4
  16. EPHPP. Quality assessment tool for quantitative studies. *Eff Public Heal Pract Proj McMaster Univ Toronto*. 2010;(1998):1-4. [https://merst.ca/wp-content/uploads/2018/02/quality-assessment-tool\\_2010.pdf](https://merst.ca/wp-content/uploads/2018/02/quality-assessment-tool_2010.pdf)
  17. Armijo-Olivo S, Stiles CR, Hagen NA, Biondo PD, Cummings GG. Assessment of study quality for systematic reviews: a comparison of the Cochrane Collaboration Risk of Bias Tool and the Effective Public Health Practice Project Quality Assessment Tool: methodological research. *J Eval Clin Pract*. 2012;18(1):12-18. doi:10.1111/j.1365-2753.2010.01516.x
  18. Barck-Holst P, Nilsson A, Åkerstedt T, Hellgren C. Reduced working hours and stress in the Swedish social services: A longitudinal study. *Int Soc Work*. 2017;60(4):897-913. doi:10.1177/0020872815580045
  19. Schiller H, Lekander M, Rajaleid K, et al. The impact of reduced worktime on sleep and perceived stress – A group randomized intervention study using diary data. *Scand J Work Environ Heal*. 2017;43(2):109-116. doi:10.5271/sjweh.3610
  20. von Thiele Schwarz U, Lindfors P, Lundberg Ui. Health-related effects of worksite interventions involving physical exercise and reduced workhours. *Scand J Work Environ Heal*. 2008;34(3):179-188. doi:10.5271/sjweh.1227
  21. Von Thiele Schwarz U, Hasson H. Employee self-rated productivity and objective organizational production levels: Effects of worksite health interventions involving reduced work hours and physical exercise. *J Occup Environ Med*. 2011;53(8):838-844. doi:10.1097/JOM.0b013e31822589c2
  22. Wergeland E, Veiersted B, Ingre M, et al. A shorter workday as a means of reducing the occurrence of musculoskeletal disorders. *Scand J Work Environ Heal*. 2003;29(1):27-34. doi:10.5271/sjweh.701
  23. Lorentzon B. *23 Månader Med 6 Timmar. Följeforskning Om Försök Med Reducerad Arbetstid.*; 2017.
  24. Åkerstedt T, OLSSON B, INGRE M, Holmgren Caicedo M, Kecklund G. A 6-hour working day--effects on health and well-being. *J Hum Ergol (Tokyo)*. 2001;30:197-202. doi:10.11183/jhe1972.30.197
  25. Dallner M, Elo AL, Gamberale F, et al. Validation of the general nordic questionnaire (QPSNordic) for psychological and social factors at work. *Nord Counc Minist*. 2000;12.
  26. Virtanen M, Ferrie JE, Gimeno D, et al. Long Working Hours and Sleep Disturbances: The Whitehall II Prospective Cohort Study. *Sleep*. 2009;32(6):737-745. doi:10.1093/sleep/32.6.737
  27. NAKASHIMA M, MORIKAWA Y, SAKURAI M, et al. Association between long working hours and sleep problems in white-collar workers. *J Sleep Res*. 2011;20(1pt1):110-116. doi:10.1111/j.1365-2869.2010.00852.x
  28. Åkerstedt T, Fredlund P, Gillberg M, Jansson B. Work load and work hours in relation to disturbed sleep and fatigue in a large representative sample. *J Psychosom Res*. 2002;53(1):585-588. doi:10.1016/s0022-

1  
2  
3  
4  
5  
6  
7  
8  
9  
10  
11  
12  
13  
14  
15  
16  
17  
18  
19  
20  
21  
22  
23  
24  
25  
26  
27  
28  
29  
30  
31  
32  
33  
34  
35  
36  
37  
38  
39  
40  
41  
42  
43  
44  
45  
46  
47  
48  
49  
50  
51  
52  
53  
54  
55  
56  
57  
58  
59  
60

3999(02)00447-6

29. Anttila T, Nätti J, Väisänen M. THE EXPERIMENTS OF REDUCED WORKING HOURS IN FINLAND. *Community Work Fam.* 2005;8(2):187-209. doi:10.1080/13668800500049704
30. Bauman AE, Reis RS, Sallis JF, et al. Correlates of physical activity: Why are some people physically active and others not? *Lancet.* 2012;380(9838):258-271. doi:10.1016/S0140-6736(12)60735-1

For peer review only

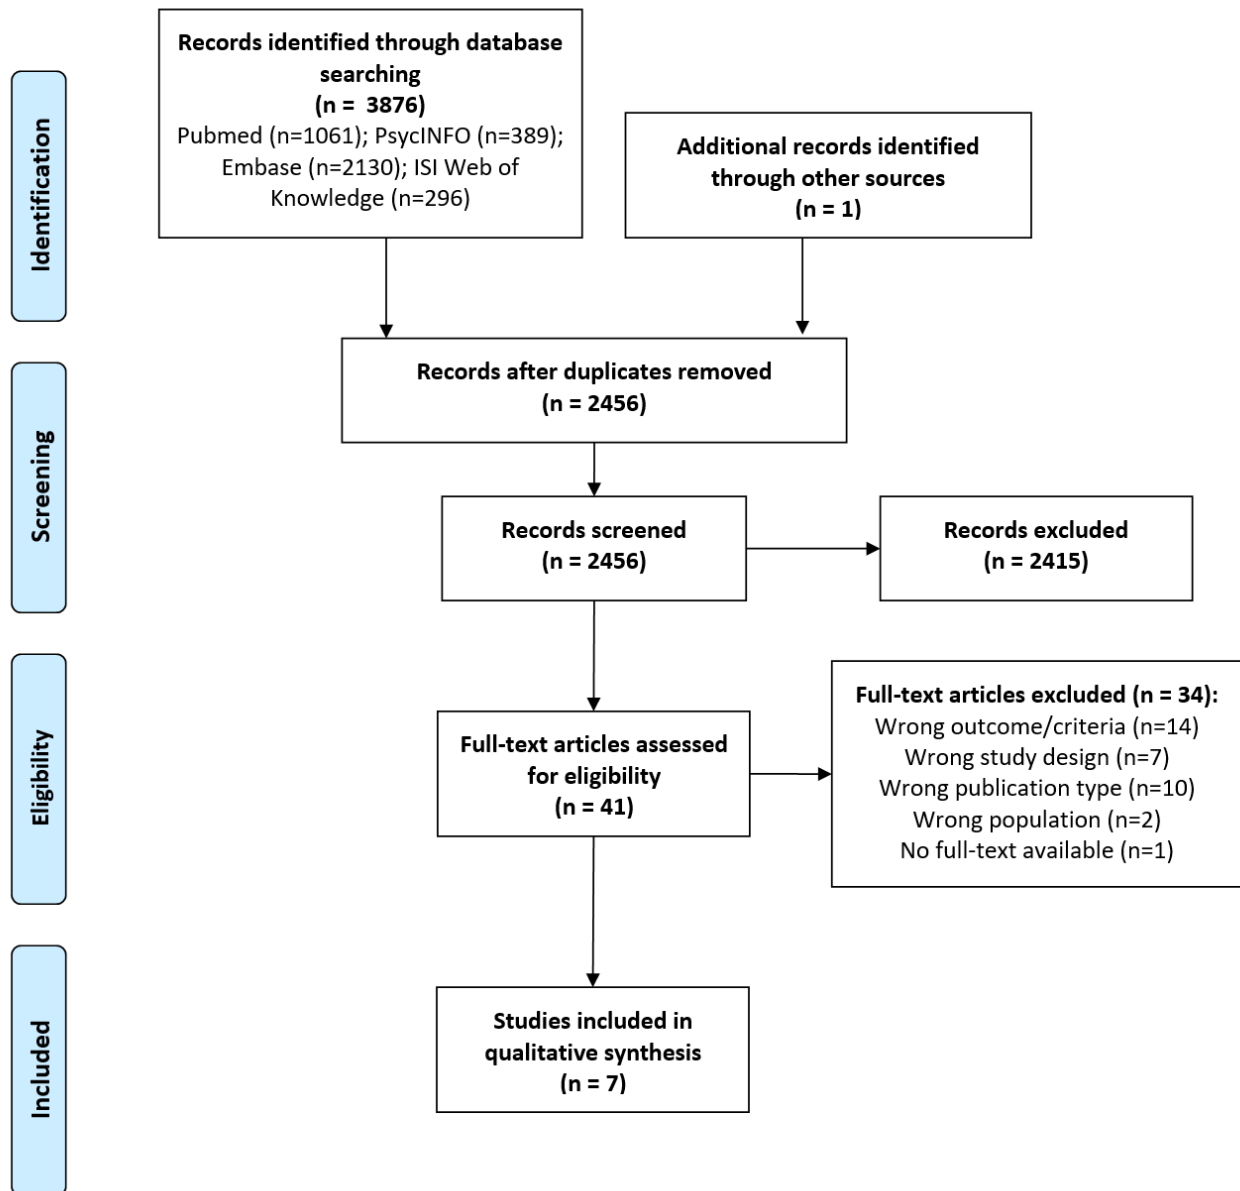

43 **Figure 1** Systematic review: selection process. From: Moher D, Liberati A, Tetzlaff J, Altman DG, The PRISMA  
44 Group (2009). Preferred Reporting Items for Systematic Reviews and Meta- Analyses: The PRISMA Statement. PLoS  
45 Med 6(7): e1000097. doi:10.1371/journal.pmed1000097.



**Supplemental File 1: search strategies****MEDLINE**

("work"[Mesh] OR "Employment"[Mesh] OR work\* [Tiab] OR "Employment"[Tiab])

AND

("Mental Health"[Mesh] OR "Occupational Health"[Mesh] OR "Quality of Life/psychology"[Mesh] OR "Occupational Diseases"[Mesh] OR "quality of life"[Tiab] OR "stress" [Tiab] OR "Mental Health" [Tiab] OR "Occupational Health" [Tiab] OR "sleep" [Tiab] OR "health" [Tiab] OR "mental disorders" [Tiab] OR "psychological disorders" [Tiab] OR "insomnia" [Tiab] OR "well-being" [Tiab] OR "anxiety" [Tiab] OR "depression" [Tiab] or "depressive disorder" [Tiab])

AND

("worktime reduction" [Tiab] OR "reduced workhours" [Tiab] OR "reduced working hours" [Tiab] OR "weekly work hours" [Tiab] OR "weekly working hours" [Tiab] OR "shorter workday"[Tiab] OR "6-hour working day" [Tiab] OR "reduced work hours"[Tiab] OR "reduced worktime"[tiab] OR "work week" [Tiab] OR "workday" [Tiab])

**PsycINFO**

(DE "Work Load" OR DE "Work Scheduling" OR DE "Workplace intervention" OR TI "work" OR AB "work")

AND

(DE "Mental Health" OR DE "Occupational Health" OR DE "Mental Disorders" OR DE "Occupational Stress" OR DE "Quality of life" OR TI "Stress" OR AB "Stress" OR TI "Mental Health" OR AB "Mental Health" OR TI "Occupational Health" OR AB "Occupational Health" OR TI "sleep" OR AB "sleep" OR TI "health" OR AB "health" OR TI "mental disorder\*" OR AB "mental disorders" OR TI "psychological disorders" OR AB "psychological disorders" OR TI "insomnia" OR AB "insomnia" OR TI "well-being" OR AB "well-being" OR TI "anxiety" OR AB "anxiety" OR TI "depression" OR AB "depression" OR TI "depressive disorder" OR AB "depressive disorder")

AND

(TI "worktime reduction" OR AB "worktime reduction" OR TI "reduced workhours" OR AB "reduced workhours" OR TI "reduced working hours" OR AB "reduced working hours" OR TI "weekly work hours" OR AB "weekly work hours" OR TI "weekly working hours" OR AB "weekly working hours" OR TI "shorter workday" OR AB "shorter workday" OR TI "6-hour working day" OR AB "6-hour working day" OR TI "reduced work hours" OR AB "reduced work hours" OR TI "reduced worktime" OR AB "reduced worktime" OR TI "work week" OR AB "work week" OR TI "workday" OR AB "workday")

**EMBASE**

('work'/exp OR work\*:ti,ab,kw OR 'employment'/exp OR 'employment':ti,ab,kw)

AND

('mental health'/exp OR 'occupational health'/exp OR 'quality of life'/exp OR 'occupational disease'/exp OR 'quality of life':ti,ab,kw OR 'stress':ti,ab,kw OR 'Mental Health':ti,ab,kw OR 'Occupational Health':ti,ab,kw OR 'sleep':ti,ab,kw OR 'health':ti,ab,kw OR 'mental disorders':ti,ab,kw OR 'psychological disorders':ti,ab,kw OR 'insomnia':ti,ab,kw OR 'well-being':ti,ab,kw OR 'anxiety':ti,ab,kw OR 'depression':ti,ab,kw OR 'depressive disorder':ti,ab,kw)

AND

('worktime reduction':ti,ab,kw OR 'reduced workhours':ti,ab,kw OR 'reduced working hours':ti,ab,kw OR 'weekly work hours':ti,ab,kw OR 'weekly working hours':ti,ab,kw OR 'shorter workday':ti,ab,kw OR '6-hour working

1  
2  
3 day':ti,ab,kw OR 'reduced work hours':ti,ab,kw OR 'reduced worktime':ti,ab,kw OR 'work week':ti,ab,kw OR  
4 'workday':ti,ab,kw)  
5

6 **WEB OF SCIENCE**  
7

8 (job OR work\*OR Employment)  
9

10 AND  
11

12 ("quality of life" OR "stress" OR "Mental Health" OR "Occupational Health" OR "sleep" OR "health" OR "mental  
13 disorders" OR "psychological disorders" OR "insomnia" OR "well-being" OR "anxiety" OR "depression" OR  
14 "depressive disorder")  
15

16 AND  
17

18 ("worktime reduction" OR "reduced workhours" OR "reduced working hours" OR "weekly work hours" OR "weekly  
19 working hours" OR "shorter workday" OR "6-hour working day" OR "reduced work hours" OR "reduced worktime"  
20 OR "work week" OR "workday")  
21  
22  
23  
24  
25  
26  
27  
28  
29  
30  
31  
32  
33  
34  
35  
36  
37  
38  
39  
40  
41  
42  
43  
44  
45  
46  
47  
48  
49  
50  
51  
52  
53  
54  
55  
56  
57  
58  
59  
60

# BMJ Open

## How the reduction of working hours could influence health outcomes: a systematic review of published studies

|                                 |                                                                                                                                                                                                                                                                                                                                                                                                                                                                                                                                                                                                                                                                                                                                                |
|---------------------------------|------------------------------------------------------------------------------------------------------------------------------------------------------------------------------------------------------------------------------------------------------------------------------------------------------------------------------------------------------------------------------------------------------------------------------------------------------------------------------------------------------------------------------------------------------------------------------------------------------------------------------------------------------------------------------------------------------------------------------------------------|
| Journal:                        | <i>BMJ Open</i>                                                                                                                                                                                                                                                                                                                                                                                                                                                                                                                                                                                                                                                                                                                                |
| Manuscript ID                   | bmjopen-2021-051131.R1                                                                                                                                                                                                                                                                                                                                                                                                                                                                                                                                                                                                                                                                                                                         |
| Article Type:                   | Original research                                                                                                                                                                                                                                                                                                                                                                                                                                                                                                                                                                                                                                                                                                                              |
| Date Submitted by the Author:   | 23-Oct-2021                                                                                                                                                                                                                                                                                                                                                                                                                                                                                                                                                                                                                                                                                                                                    |
| Complete List of Authors:       | Voglino, Gianluca; University of Turin, Department of Public Health<br>Savatteri, Armando; University of Turin, Department of Public Health and Paediatric Sciences<br>Gualano, Maria; University of Turin, Department of Public Health and Paediatric Sciences<br>Catozzi, Dario; University of Turin, Department of Public Health<br>Rousset, Stefano; University of Turin, Department of Public Health and Paediatric Sciences<br>Boietti, Edoardo; University of Turin, Department of Public Health and Paediatric Sciences<br>Bert, Fabrizio; University of Turin, Department of Public Health; University Hospital City of Science and Health Turin<br>Siliquini, Roberta; Università degli Studi di Torino, Department of Public Health |
| <b>Primary Subject Heading</b>: | Occupational and environmental medicine                                                                                                                                                                                                                                                                                                                                                                                                                                                                                                                                                                                                                                                                                                        |
| Secondary Subject Heading:      | Public health, Health policy                                                                                                                                                                                                                                                                                                                                                                                                                                                                                                                                                                                                                                                                                                                   |
| Keywords:                       | OCCUPATIONAL & INDUSTRIAL MEDICINE, PUBLIC HEALTH, Health & safety < HEALTH SERVICES ADMINISTRATION & MANAGEMENT, Health policy < HEALTH SERVICES ADMINISTRATION & MANAGEMENT                                                                                                                                                                                                                                                                                                                                                                                                                                                                                                                                                                  |
|                                 |                                                                                                                                                                                                                                                                                                                                                                                                                                                                                                                                                                                                                                                                                                                                                |

SCHOLARONE™  
Manuscripts

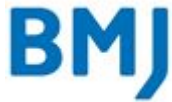

I, the Submitting Author has the right to grant and does grant on behalf of all authors of the Work (as defined in the below author licence), an exclusive licence and/or a non-exclusive licence for contributions from authors who are: i) UK Crown employees; ii) where BMJ has agreed a CC-BY licence shall apply, and/or iii) in accordance with the terms applicable for US Federal Government officers or employees acting as part of their official duties; on a worldwide, perpetual, irrevocable, royalty-free basis to BMJ Publishing Group Ltd ("BMJ") its licensees and where the relevant Journal is co-owned by BMJ to the co-owners of the Journal, to publish the Work in this journal and any other BMJ products and to exploit all rights, as set out in our [licence](#).

The Submitting Author accepts and understands that any supply made under these terms is made by BMJ to the Submitting Author unless you are acting as an employee on behalf of your employer or a postgraduate student of an affiliated institution which is paying any applicable article publishing charge ("APC") for Open Access articles. Where the Submitting Author wishes to make the Work available on an Open Access basis (and intends to pay the relevant APC), the terms of reuse of such Open Access shall be governed by a Creative Commons licence – details of these licences and which [Creative Commons](#) licence will apply to this Work are set out in our licence referred to above.

Other than as permitted in any relevant BMJ Author's Self Archiving Policies, I confirm this Work has not been accepted for publication elsewhere, is not being considered for publication elsewhere and does not duplicate material already published. I confirm all authors consent to publication of this Work and authorise the granting of this licence.

1  
2  
3 1 **Title page**

4 2  
5 3  
6 3 **Title:**

7 4 How the reduction of working hours could influence health outcomes: a systematic review of published studies  
8  
9 5

10 6 **Authors:**

11 7 Gianluca Voglino<sup>1</sup>, Armando Savatteri<sup>1</sup>, Maria Rosaria Gualano<sup>1</sup>, Dario Catozzi<sup>1</sup>, Stefano Rousset<sup>1</sup>, Edoardo Boietti<sup>1</sup>,  
12 8 Fabrizio Bert<sup>1</sup>, Roberta Siliquini<sup>1,2</sup>  
13  
14 9

15  
16 10 <sup>1</sup>Department of Public Health and Paediatric Sciences, University of Turin, Torino, Italy.

17 11 <sup>2</sup>A.O.U. City of Health and Science of Turin, Turin, Italy.  
18  
19 12

20 13 **Corresponding author:**

21 14 Maria Rosaria Gualano, Via Santena 5 bis, 10126, Turin, Italy

22 15 Email: mariarosaria.gualano@unito.it  
23  
24 16  
25

26 17 **Word count:** 4483  
27  
28 18  
29 19  
30 20  
31 21  
32 22  
33 23  
34 24  
35 25  
36 26  
37 27  
38 28  
39 29  
40 30  
41 31  
42 32  
43 33  
44 34  
45 35  
46 36  
47 37  
48 38  
49 39  
50 40  
51 41  
52  
53  
54  
55  
56  
57  
58  
59  
60  
61

1  
2  
3  
4  
5  
6  
7  
8  
9  
10  
11  
12  
13  
14  
15  
16  
17  
18  
19  
20  
21  
22  
23  
24  
25  
26  
27  
28  
29  
30  
31  
32  
33  
34  
35  
36  
37  
38  
39  
40  
41  
42  
43  
44  
45  
46  
47  
48  
49  
50  
51  
52  
53  
54  
55  
56  
57  
58  
59  
60

## **ABSTRACT**

### **Objectives**

The health effects of worktime arrangements have been largely studied for long working hours, whereas a lack of knowledge remains regarding the potential health impact of reduced worktime interventions. Therefore, we conducted this review in order to assess the relationships between worktime reduction and health outcomes.

### **Design**

Systematic review of published studies. Medline, PsycInfo, Embase and Web of Science databases were searched from January 2000 up to November 2019.

### **Outcomes**

The primary outcome was the impact of reduced working time with retained salary on health effects. Interventional and observational studies providing a quantitative analysis of any health-related outcome were included. Studies with qualitative research methods were excluded.

### **Results**

A total of 3876 published articles were identified and 7 studies were selected for the final analysis, all with a longitudinal interventional design. The sample size ranged from 63 participants to 580 workers, mostly from healthcare settings. Two studies assessed a work-time reduction to 6 hours per day; two studies evaluated a weekly work-time reduction of 25%; two studies evaluated simultaneously a reduced weekly work-time reduction proportionally to the amount of time worked and a 2.5 hours of physical activity program per week instead of work time; one study assessed a reduced weekly work-time reduction from 39 to 30 hours per week. A positive relationship between reduced working hours and working life quality, sleep and stress was observed. It is unclear whether work time reduction determined an improvement in general health outcomes, such as self-perceived health and well-being.

### **Conclusions**

These findings suggest that the reduction of working hours with retained salary could be an effective workplace intervention for the improvement of employees' well-being, especially regarding stress and sleep. Further studies in different contexts are needed to better evaluate the impact of worktime reduction on other health outcomes

**Keywords:** working hours; well-being; reducing worktime; working life quality

### **Strengths and limitations**

- This is the first systematic review carried out in English to evaluate the impact of reduced working hours on both self-reported and measured health outcomes.
- All of the included studies had a longitudinal design, and in all studies except two the employment of extra-personnel allowed to prevent a compensatory increase in workload, which may have limited the effectiveness of worktime reduction.
- The included studies were carried out in the Scandinavian setting, thus limiting the generalizability of the results in other contexts, different from a social, cultural and economic point of view.

- Three out of seven studies had a weak quality according to the authors, and most of the studies were carried out in the healthcare setting.

## INTRODUCTION

In Organization for Economic Cooperation and Development (OECD) countries the average working week consists of 37 hours<sup>1</sup>. OECD Data on annual average working hours show that, despite a declining trend in the amount of worked hours, many Countries still exceed the standard<sup>2</sup>. Working long hours is widely recognized as detrimental for employees' health. Indeed, several studies investigating the health effects of working overtime reported concerning findings, including increased risk of stroke, coronary heart disease, anxiety, depression, sleep disorders and adverse pregnancy outcomes in women<sup>3-5</sup>. Furthermore, a systematic assessment of evidence in literature with meta-analyses conducted by Rivera et al. found moderate-grade evidence linking long work-hours with stroke and low-grade evidence on the association between long work-hours with coronary disease, depression and pregnancy complications, including low birth weight babies and preterm delivery<sup>6</sup>. Long working hours have also been associated with reduced levels of work-life balance and increased work-family conflict<sup>7</sup>.

Conversely, the effects of reduced work-hours have not been extensively examined as for long work-hours so far. Indeed, several experiments of reducing working time have been conducted throughout the years, both in the public and private sector. One of the most notable examples was the adoption of the "35-hour Workweek" between 1998 and 2000 by the French Government, which allowed the reduction of weekly working hours from 39 to 35, with the aim of fighting the high unemployment rates. However, aside from two surveys examining employees' satisfaction with modified work-hours and their work-family conflict, no other impacts on health and well-being have been evaluated<sup>8,9</sup>. The authors argue that the French 35-hours law increased overall dissatisfaction with modified work hours among employees, mainly because it did not take into account the heterogeneity of work organization. It appears that employees increased workload to maintain high productivity. Indeed, reducing working time without employing extra-personnel may compromise the fine balance between job demand and resources, which in turn would undermine employees' wellbeing<sup>10</sup>. Further interventions have been carried out on a company level. In Germany, Volkswagen reduced the working week from 36 to 28.8 hours<sup>11</sup> and more recently, Microsoft Japan tested a four-days work week<sup>12</sup>. Similarly, Perpetual Guardian, a New Zealand firm operating in the management of trusts, wills and estates, ran a four-day work week trial for all its 240 employees<sup>13</sup>. Although companies reported successful results, they did not take into consideration the potential health impact of these experiences.

Besides, there are few studies even in scientific literature that investigate the role of reduced work hours on workers' health. To our knowledge, only one literature review was conducted in 2005 and authors concluded that no relevant effects on health were observed<sup>14</sup>. However, the review was published in Swedish, hence it may represent an issue due to language barriers. Furthermore, the studies included in their work were mostly reports from Swedish ministerial committees and critical reviews on work time arrangements. Indeed, in the studies published before 2000 authors were primarily interested in the economic consequences of reducing work-hours, exploring the feasibility of the project, and little attention was paid to the effects of worktime reduction on the health of employees. Since 2000, several interventional studies have been published. Therefore, we decided to conduct a review of the literature examining studies focusing on the relationship between reduced working hours and health effects, published since 2000, in which employees retained their salary and proportionally decreased their work time and workload.

1  
2  
3  
4  
5  
6  
7  
8  
9  
10  
11  
12  
13  
14  
15  
16  
17  
18  
19  
20  
21  
22  
23  
24  
25  
26  
27  
28  
29  
30  
31  
32  
33  
34  
35  
36  
37  
38  
39  
40  
41  
42  
43  
44  
45  
46  
47  
48  
49  
50  
51  
52  
53  
54  
55  
56  
57  
58  
59  
60  
164

## **METHODS**

### **Search strategy**

Following the Preferred Reporting Items for Systematic Reviews and Meta-Analyses (PRISMA) checklist we carried out a literature search for articles published in Medline, PsycInfo, Embase and Web of Science databases from January 2000 up to November 2019. Search terms included terms like “work”, “health”, “well-being”, “mental-health”, “worktime reduction”, “reduced work hours”. Full search strings for each database are provided in supplemental file 1. First, duplicates were excluded. Next, AS, DC, EB and GV independently screened retrieved sources by title and abstract following inclusion criteria. The same authors, always in an independent fashion, performed a full text review. Finally, consensus was reached through discussion about uncertain cases between all reviewers. Authors chose Rayyan QCRI as a tool for selecting and extracting relevant records<sup>15</sup>.

### **Inclusion and exclusion criteria**

We decided to include primary sources in any form, both interventional and observational studies, provided that quantitative analysis of any health-related outcome were performed. Hence, studies with qualitative research methods were excluded because we were interested on the effects of the interventions in terms of quantitatively measured outcomes. Articles had to investigate the association between reduced working time with retained salary and health effects, without excluding beforehand any category of workers. No salary reduction was considered crucial in order to avoid a selection bias possibly leading to exclude low-income workers. Another inclusion criterion was the replacement of working activity with any workplace-based intervention, provided that the amount of work hours was effectively reduced. Conversely, studies specifically focused on worktime reduction policies regarding activities with excessively long working hours, such as medical residency, were not consistent with the concept of reduced working hours and retained salary and were therefore excluded from our work. No language restriction was set. Due to the heterogeneity in the outcomes evaluated by the studies selected, a meta-analysis of data could not be conducted. Data and information regarding study design, Country, participant characteristics, observation period, intervention description, outcomes measured and results were extracted and synthesized in a systematic literature review.

### **Quality assessment**

The quality of the included studies was assessed using the “Quality Assessment Tool for Quantitative Studies” developed by the Effective Public Health Practice Project (EPHPP)<sup>16</sup>. This quality appraisal tool provides a standardized means to assess study quality and develop recommendations for study findings considering eight components of study methodology: selection bias, study design, presence of confounders, blinding of participants and outcome assessors, validity and reliability of data collection methods and study dropouts and withdrawals. The overall quality of each study is then expressed as weak, moderate or strong. Previous evaluation of the tool has shown it to be valid and reliable<sup>17</sup>. Two reviewers, namely AS and SR, independently performed quality assessment. Discrepancies between the reviewers, such as differences in interpretation of criteria and studies, were resolved by discussion in order to reach consensus. The overall quality was found to be strong for three studies, moderate for one study and weak for three studies.

### **Patient and Public Involvement**

No patient involved. Results will be disseminated throughout conferences and social media in order to enrich public debate on health outcomes of working hours rearrangements.

## **RESULTS**

As results of the bibliographic search, a total of 3876 published articles were identified (**Figure 1**).



1  
2  
3 165  
4 166 [Figure 1].  
5  
6 167

7 168 Duplicates were excluded and remaining 2456 records were reviewed. A full-text review was conducted on 40 articles.  
8  
9 169 Finally, after evaluating the inclusion criteria, 7 articles were selected (1 article was originally added by citation chasing).  
10 170 In Total 7 articles, with a longitudinal interventional design, were included in the final analysis<sup>18-24</sup>. A brief summary of  
11  
12 171 included articles is provided in **Table 1**.  
13 172

14 173 The included studies were published between 2001<sup>24</sup> and 2017<sup>18,19,23</sup> and they were performed in northern Europe<sup>18-24</sup>. The  
15 174 sample size ranged from 63 participants<sup>24</sup> to 580 workers<sup>19</sup>, mostly from healthcare settings<sup>20-24</sup>. Only one of the included  
16 175 studies enrolled workers from different workplaces in the public sector (Schiller et al. 2017). All the studies included had  
17 176 a longitudinal design and the observation period was between 12 months<sup>20-22</sup> and 23 months<sup>23</sup>. Although all the studies  
18 177 compared the intervention group to a control group with no work-time modifications, the intervention examined were  
19 178 different. In particular, two studies assessed a work-time reduction to 6 hours per day<sup>22,23</sup>, two studies evaluated a weekly  
20 179 work-time reduction of 25%<sup>18,19</sup>, two studies evaluated simultaneously a reduced weekly work-time reduction  
21 180 proportionally to the amount of time worked (reduced work hours group) and a 2.5 hours per week physical activity  
22 181 instead of work time program (physical exercise group)<sup>20,21</sup> and one study assessed a reduced weekly work-time reduction  
23 182 from 39 to 30 hours per week<sup>24</sup>. The included studies assessed a variety of different outcomes. In particular general  
24 183 symptoms<sup>20,23,24</sup>, neuro-psychological symptoms<sup>18,23,24</sup>, working life quality<sup>18,20-24</sup>, quality of life<sup>18,23,24</sup>, physical activity  
25 184 <sup>20,23,24</sup>, sleep<sup>18,19,23,24</sup>, musculoskeletal disorders<sup>20,22,23</sup> and biological markers<sup>20</sup> were assessed.

26 185 In particular, Åkerstedt and colleagues performed a longitudinal cohort study in 5 different healthcare settings, in order  
27 186 to compare the effects of work-hours reduction among health care and day care nursery personnel. The study involved a  
28 187 total of 63 nurses, 41 in the experimental group, a 9 hours reduction of the working week from 39 hours per week to 30  
29 188 hours, retaining full pay, and 22 in the control group. The experimental group showed a significant improvement for  
30 189 heart/respiratory symptoms, mental fatigue, sleep quality, time for social, time for family/friends, influence on work-  
31 190 hours and satisfaction with work-hours. Additionally, most of these variables also showed a significant change over time.  
32 191 Furthermore, there was a positive change over time for pain/ache complaints, nervous symptoms, gastrointestinal  
33 192 complaints, insomnia complaints, refreshed at awakening, sleepiness at work/leisure time, involuntary sleep at work and  
34 193 leisure time and satisfaction with the work situation. On the contrary, no significant interaction was found between  
35 194 reduced work hours and exercise, weight and BMI<sup>24</sup>.

36 195 Similar results were published by Barck-Holst and colleagues. They performed a longitudinal quasi experimental study  
37 196 involving seven public social service agencies. Employees in the intervention group reduced their work hours by 25% but  
38 197 retained their previous salary and their organizations were fully reimbursed and staff to compensate the loss of work hours  
39 198 was hired. After controlling for baseline values, gender and age, there was a significant difference in change over time  
40 199 between intervention and control group during workdays on the restorative sleep index, average stress level, the stress  
41 200 index, the memory difficulties index, the negative emotion index, average sleepiness and the fatigue and exhaustion  
42 201 index<sup>18</sup>.  
43 202  
44 203  
45 204  
46 205  
47 206  
48 207  
49 208  
50 209  
51 210  
52 211  
53 212  
54 213  
55 214  
56 215  
57 216  
58 217  
59 218  
60 219

1  
2 205 Table 1. Characteristics of the studies included in systematic review.  
3 206

| Author                 | Study Design                    | Country & Participants                                                                     | Observation period | Intervention description                                                                                                                                                                            | Outcome (measures)                                                                                                                                                                                                                                                                                                                                                       | Results                                                                                                                                                                                                                                                                                                                                   | Quality assessment rating |
|------------------------|---------------------------------|--------------------------------------------------------------------------------------------|--------------------|-----------------------------------------------------------------------------------------------------------------------------------------------------------------------------------------------------|--------------------------------------------------------------------------------------------------------------------------------------------------------------------------------------------------------------------------------------------------------------------------------------------------------------------------------------------------------------------------|-------------------------------------------------------------------------------------------------------------------------------------------------------------------------------------------------------------------------------------------------------------------------------------------------------------------------------------------|---------------------------|
| Akersredt et al, 2001  | Longitudinal intervention study | Sweden, N = 63, full-time workers in health care service.                                  | 36 Months          | Intervention group (N=41): reduced WHW from 39 hrs/week to 30 hrs/week.<br>Control group (N=22): unchanged working time.                                                                            | <ul style="list-style-type: none"> <li>– <b>General symptoms,</b></li> <li>– <b>neuro-psychological symptoms,</b></li> <li>– <b>working life quality,</b></li> <li>– <b>quality of life,</b></li> <li>– <b>physical activity,</b></li> <li>– <b>sleep</b></li> </ul>                                                                                                     | Subjective sleep quality (SSQ), mental fatigue and heart/respiratory symptoms, time for social activity, time for family and friends improved significantly more in the experimental group than in the control group. No significant effects for sickness absence or self-rated health.                                                   | Weak                      |
| Wergeland et al, 2003  | Longitudinal intervention study | Norway and Sweden, N = 403. Workers in nursing homes, home care services and kindergartens | 12-22 Months       | Intervention group: reduced DWH to 6 hrs/day.<br>Reference group: unchanged working time.                                                                                                           | <ul style="list-style-type: none"> <li>– <b>Musculoskeletal disorders,</b> (shoulder-neck and back pain frequency and work-related physical exhaustion)</li> <li>– <b>working life quality</b></li> </ul>                                                                                                                                                                | A significant interaction was found for neck-shoulder pain and for exhaustion after work in the intervention group.<br>No significant effects were observed in the reference group.                                                                                                                                                       | Weak                      |
| von Thiele et al, 2008 | Longitudinal intervention study | Sweden, N = 177 employees from 6 workplaces at public dental health care organization      | 12 Months          | PE group: 2.5 hrs/week of physical activity instead of work time.<br>Reduced work hours group: reduced WHW proportionally to the amount of time worked.<br>Reference group: unchanged working time. | <ul style="list-style-type: none"> <li>– <b>General symptoms,</b></li> <li>– <b>musculoskeletal disorders,</b></li> <li>– <b>working life quality</b> (work-home interference, recovery from work and work ability),</li> <li>– <b>physical activity</b></li> <li>– <b>biological markers</b> (blood lipids, neuroendocrine markers, cardiovascular measures)</li> </ul> | Physical activity increased in all three groups. Decreased glucose and upper-extremity disorders were found in the exercise group, while increased HDL and waist-to-hip ratio was found among those working reduced hours.<br>Participants working reduced hours also had increased total cholesterol and no changes in LDL-to-HDL ratio. | Strong                    |
| von Thiele et al, 2011 | Longitudinal intervention study | Sweden, N = 177 employees from 6 workplaces at a public dental health care organization    | 12 Months          | PE group: 2.5 hrs/week of physical activity instead of work time.<br>Reduced work hours group: reduced WHW proportionally to the amount of time worked.                                             | <ul style="list-style-type: none"> <li>– <b>On-the-job productivity,</b></li> <li>– <b>working life quality</b> (sickness presenteeism and sickness absenteeism)</li> <li>– <b>Objective production levels</b> (administrative records)</li> </ul>                                                                                                                       | Physical activity was associated with an increase in self-rated productivity in terms of increased quantity of work and work-ability and decreased frequency and number of days of sickness absence. No effect was found in the work hours reduction group. In all three groups there was an increase in                                  | Strong                    |

|                                |                                            |                                                                        |           |                                                                                                   |                                                                                                                                                                                                                                                                                                                                                                                                                               |                                                                                                                                                                                                                                                                                                                                                                                                                                                                                                       |          |
|--------------------------------|--------------------------------------------|------------------------------------------------------------------------|-----------|---------------------------------------------------------------------------------------------------|-------------------------------------------------------------------------------------------------------------------------------------------------------------------------------------------------------------------------------------------------------------------------------------------------------------------------------------------------------------------------------------------------------------------------------|-------------------------------------------------------------------------------------------------------------------------------------------------------------------------------------------------------------------------------------------------------------------------------------------------------------------------------------------------------------------------------------------------------------------------------------------------------------------------------------------------------|----------|
|                                |                                            |                                                                        |           | Reference group: unchanged working time.                                                          |                                                                                                                                                                                                                                                                                                                                                                                                                               | the number of treated patients per therapist, significantly greater in the reduced work hours group.                                                                                                                                                                                                                                                                                                                                                                                                  |          |
| <b>Barck-Holst et al, 2017</b> | Longitudinal quasi-experimental trial      | Sweden, N= 204 A total of 125 participants were deemed as per protocol | 18 Months | Intervention group: reduced work hours by 25%.<br>Reference group: unchanged working time.        | <ul style="list-style-type: none"> <li>– <b>Neuro-psychological symptoms</b></li> <li>– <b>working life quality</b> (demands, control, social support, instrumental manager support, instrumental coworker support, work intrusion on private life)</li> <li>– <b>sleep</b></li> </ul>                                                                                                                                        | The intervention group significantly improved restorative sleep, stress, memory difficulties, negative emotion, sleepiness, fatigue and exhaustion on both work days and weekends. Improved demands, instrumental manager support and work intrusion on private life were observed in the intervention group. Sleep quality was improved on weekends.                                                                                                                                                 | Moderate |
| <b>Lorentzon 2017</b>          | Longitudinal intervention study            | Sweden, N = 124, nurses working in a centre for the elderly            | 23 Months | Intervention group: work-time reduction to 6 hrs/day.<br>Reference group: unchanged working time. | <ul style="list-style-type: none"> <li>– <b>General symptoms,</b></li> <li>– <b>musculoskeletal disorders,</b></li> <li>– <b>neuro-psychological symptoms</b> (alertness level, perceived fatigue, energy left at home, feeling calm, perceived stress),</li> <li>– <b>working life quality</b> (collaboration and personal development, sick leaves),</li> <li>– <b>physical activity</b></li> <li>– <b>sleep</b></li> </ul> | Good perceived health and alertness level, satisfactory level of perceived fatigue. Having energy left at home, feeling calm, satisfactory levels of stress, average sleep time increased in intervention group.<br>General symptoms, sleep and musculoskeletal symptoms improved in the intervention group, and dropped in the control group.<br>Collaboration and personal development improved; improved sense of collaboration between nurses.<br>Sick leave increased in the intervention group. | Weak     |
| <b>Schiller et al, 2017</b>    | Longitudinal controlled intervention study | Sweden, N=580, workers from 33 workplaces in the public sector         | 18 Months | Intervention group: reduced WWH by 25%.<br>Reference group: unchanged working time.               | <ul style="list-style-type: none"> <li>– <b>Sleep</b></li> <li>– <b>perceived stress,</b> feeling of worries</li> </ul>                                                                                                                                                                                                                                                                                                       | On workdays, the intervention group displayed improved SSQ, 23 minutes extended sleep duration, decreased sleepiness and perceived stress and less feelings of worries and stress at bedtime when work hours were reduced. The intervention showed positive effects on days off, except for sleep duration.                                                                                                                                                                                           | Strong   |

1  
2

3 208 In addition, a longitudinal controlled intervention study evaluating a 25% reduction of weekly work hours was published  
4 209 in 2017 by Schiller and colleagues. In this paper, participants worked at 33 different workplaces, in four sectors: social  
5 210 services (n=170); technical services (n=236); care and welfare (n=159); call-centre (n=71). The intervention group  
6 211 (n=370) reduced work-time to 75% with preserved salary during 18 months. Data were collected at baseline (1–2 months  
7 212 before the intervention) and approximately 9 months and 18 months after the introduction of reduced work hours. On  
8 213 workdays, the intervention group (N=354) displayed improved subjective sleep quality, 23 minutes extended sleep  
9 214 duration (over the whole period of 18 months), decreased sleepiness and perceived stress and less feelings of worries and  
10 215 stress at bedtime when work hours were reduced ( $P<0.002$ ). Gender, age, having children living at home, and baseline  
11 216 values of sleep quality and worries and stress at bedtime, considered as additional between-group factors, did not influence  
12 217 the results significantly<sup>19</sup>.

13 218 Similar outcomes were assessed in a cohort study, performed between February 2015 and December 2016. In this paper,  
14 219 68 nurses from the intervention group had their working time reduced to 6 hours per day with retaining their full-time  
15 220 pay. On the contrary, nurses in the control group (N=56) had no working hours reduction. Outcomes were assessed using  
16 221 several questionnaires before, during and after the experimentation. In particular, the sick leave was 6.1% in the  
17 222 intervention group and 12.3% in the control group. Furthermore, health perceived as good (72% vs 60%), alertness level  
18 223 perceived as good (65% vs 50%), satisfactory level of perceived fatigue (+20% vs -22%), feeling having a lot of energy  
19 224 left when arriving at home (51% vs 7%, both starting from 20%), feeling calm (64% vs 45%), satisfactory levels of stress  
20 225 (+20%, -5%), average sleep time (7 hours vs 5.8 hours) had better values in the intervention group compared to the control  
21 226 group. Additionally, in the intervention group, satisfaction regarding physical activity increased (+7% vs -15%). Finally,  
22 227 general symptoms, sleep and symptoms affecting the musculoskeletal system improved in the intervention group, and  
23 228 dropped for the control group<sup>23</sup>.

24 229 Similarly, a previous paper assessing the occurrence of musculoskeletal disorders in the experimental and control groups  
25 230 was published by Wegerland and colleagues. In their longitudinal intervention study, involving subjects enrolled from  
26 231 different institutions, workers in the experimental group had their daily work-hours reduced to 6 hours, with retained  
27 232 salary and extra personnel employed to compensate for the reduction in work-hours. Participants were involved through  
28 233 a self-administered questionnaire about pain in the neck-shoulder and back regions prior to and during the work-time  
29 234 reduction. By using a multivariable analysis on data from all the institutions, authors found a significant interaction for  
30 235 neck-shoulder pain ( $p=0.034$ ) and exhaustion after work ( $P=0.009$ ). No significant interaction was found for back pain.  
31 236 Additionally, the intervention group showed increased job satisfaction after the reduction in work-hours<sup>22</sup>.

32 237 Finally, von Thiele and colleagues performed two longitudinal studies in Stockholm, Sweden, involving employees from  
33 238 six workplaces in a large public dental health care organization, randomly allocated to one of three groups: physical-  
34 239 exercise group (PE), reduced work-hours group (RWH), and reference group (R). At the two workplaces acting as  
35 240 reference, no intervention was carried out; at the two workplaces in the PE group, 2.5 hours of weekly work hours were  
36 241 allocated to mandatory physical exercise on two different days; at the two workplaces in the RWH group, full-time weekly  
37 242 hours were reduced from 40 hours/week to 37.5 hours/week. All employees in the intervention groups retained their  
38 243 salaries, and no additional personnel were employed. The final sample consisted of 177 employees, mainly women.  
39 244 Participants were instructed to complete self-ratings at baseline, after 6 months and after 12 months<sup>20,21</sup>.

40 245 In the paper published in 2008<sup>20</sup> blood samples were and questionnaire were used to explore the areas of physical activity,  
41 246 recovery from work stress, work-home interference, self-related health, work ability, general and musculoskeletal  
42 247 symptoms. The results showed a significant increase in physical exercise in all three groups over time, with post-hoc tests  
43 248 showed that the increase in the PE group was significantly greater than in the other two groups. Additionally, the analysis

1  
2  
3 249 showed increasing levels of all of the blood lipids in the reference group ( $p < 0.001$ , for total cholesterol;  $p = 0.016$ , for  
4 250 triglycerides;  $p = 0.003$ , for HDL;  $p < 0.001$ , for LDL). In the RWH group, total cholesterol and HDL had increased  
5 251 significantly ( $p = 0.019$ , for total cholesterol;  $p = 0.016$ , for HDL), while only total cholesterol had increased significantly  
6 252 in the physical-exercise group ( $p = 0.018$ ). Glucose showed a significant time  $\times$  group effect ( $p = 0.04$ ), and a significant  
7 253 decrease in the PE group ( $p = 0.036$ ). Work ability decreased in the reference group ( $p = 0.005$ ); similar results were found  
8 254 for general symptoms<sup>20</sup>.

9 255 In the paper published in 2011<sup>21</sup>, three outcomes were measured: on-the-job productivity, measured with a single item  
10 256 asking the respondents to rate their current work ability as compared with their individual best work ability on a ten-point  
11 257 scale; sickness presenteeism and sickness absenteeism, assessed with three questions; objective production levels, in terms  
12 258 of the number of treated patients and the number of therapists per month for each participating worksite as well as for all  
13 259 worksites combined. The results showed a significant increase in self-rated quantity of work ( $p = 0.029$ ) and work ability  
14 260 ( $p = 0.046$ ) in the PE group. Work ability decreased significantly in the reference group ( $p = 0.004$ ). In the PE group,  
15 261 frequency of sickness absence ( $p = 0.037$ ) and sickness duration ( $p = 0.029$ ) decreased significantly. In the reference  
16 262 group changes in sickness absence duration ( $p = 0.041$ ) and sickness presenteeism ( $p = 0.028$ ) were each significant<sup>21</sup>.

## 23 263 24 264 **DISCUSSION**

25 265 The purpose of this review was to analyze the results of studies conducted in order to explore the consequences of work  
26 266 time reduction on health outcomes, which is an emerging and debated issue especially in western countries with a  
27 267 developed welfare system, as the ones in Northern Europe. Unfortunately, there is no standard health outcome in the  
28 268 literature that can be used as a comparison in all studies to investigate the effects of reducing working hours on workers'  
29 269 health such as self-perceived health and well-being. Then, we analysed 7 published articles exploring several different  
30 270 health outcomes, and all of them were investigated and discussed.

### 31 271 **General and physical symptoms**

32 272 Four longitudinal studies analysed the relationship between work-time reduction and a broad spectrum of general and  
33 273 physical symptoms. Åkerstedt et al.<sup>24</sup> found a significant improvement of hearth/respiratory symptoms in the experimental  
34 274 group compared to the control group. However, when self-rated health was explored as an outcome, they did not find any  
35 275 statistically significant differences before and after the intervention, neither between the experimental and the control  
36 276 group, nor over time among the same group. Similar results were obtained by von Thiele et al., which did not find any  
37 277 significant differences between the intervention and the reference group regarding neither general symptoms nor self-  
38 278 rated health<sup>20</sup>. As the Authors suggest, the lack of significant results could be explained by the fact that the study was  
39 279 carried out on healthy subjects, consequently reducing the effect size, especially for self-ratings. On the other hand,  
40 280 Lorentzon et al. found an improvement in perceived health in the intervention group compared to the control group<sup>23</sup>.  
41 281 Wergeland et al., in their three-project study, found a significant reduction of neck/shoulder and back pain prevalence in  
42 282 the intervention group<sup>22</sup>, in agreement with Lorentzon et al.<sup>23</sup>, possibly due to a reduction of time spent in the sitting  
43 283 position during work-time.

44 284 Data are still contradictory and it is possible to hypothesize that the real impact of workload reduction on general and  
45 285 physical symptoms, despite having a possible effect on specific physical symptoms, remains to be determined through  
46 286 further larger studies.

### 47 287 **Neuro-psychological symptoms**

48 288 Four studies evaluated the relationship between work-time reduction and neuro-psychological symptoms<sup>18,19,23,24</sup>. General  
49 289 stress was the most frequently explored outcome. Barck-Holst et al. found an average stress level and a stress index

1  
2  
3 290 significantly decreased in the intervention group, but this difference was higher on workdays compared to weekends<sup>18</sup>.  
4 291 This is consistent with the results of Schiller et al., who found a significant reduction of stress both during the day and at  
5 292 bedtime in the intervention group<sup>19</sup>. Lorentzon et al. found that workers with reduced work-time reported satisfactory  
6 293 levels of stress and perceived fatigue more often in comparison with workers in the control group<sup>23</sup>. Åkerstedt et al. found  
7 294 a significant reduction of mental fatigue in the experimental group. In addition, they found a reduction of nervous  
8 295 symptoms and pain/ache complaints over time, but this difference was not significant between the experimental and the  
9 296 control group. As the authors suggest, the project in itself may have increased the awareness of work organization and  
10 297 health, with positive effects on both groups<sup>24</sup>.

11 298 Globally, these results suggest that the reduction of work-time is associated with a significant improvement of stress and  
12 299 other neuro-psychological symptoms, probably due to the decrease of workload and the consequent increase of free time  
13 300 for leisure activities.

### 14 301 **Sleep**

15 302 Sleep condition was evaluated in five studies<sup>18-20,23,24</sup>. Åkerstedt et al. and Schiller et al. measured subjective sleep quality  
16 303 (SSQ) using the same items and improvements were observed significantly more in the intervention group than in the  
17 304 reference group<sup>19,24</sup>. Similar results were reported by Barck-Holst et al.<sup>18</sup>. In their study on nurses, Lorentzon et al. found  
18 305 that those nurses working less hours as a part of the experiment averagely slept more than nurses who kept working with  
19 306 regular hours<sup>23</sup>. von Tiele et al. evaluated the presence of sleep disturbances as part of a more comprehensive questionnaire  
20 307 - a modified version of QPSNordic - investigating general symptoms<sup>20,25</sup>. Although they found no improvements in the  
21 308 experimental group regarding general symptoms, we cannot tell whether the occurrence of sleep disturbances taken alone  
22 309 differed among their participants. Despite different measurements being adopted, almost all studies found a significant  
23 310 improvement in sleep among intervention groups compared to control groups. As already reported by previous research,  
24 311 long working hours have shown to negatively influence sleep in many ways<sup>26,27</sup> and this effect may be explained by higher  
25 312 work demands and work-related stress<sup>28</sup>. Thus, we hypothesize that the positive effects of reduced work-time on stress  
26 313 and workload may explain the positive effects on sleep.

### 27 314 **Quality of working life**

28 315 All studies except one investigated whether reduced work hours had measurable effects on working life quality<sup>18-20,22-24</sup>.  
29 316 Åkerstedt et al. found no effects on work demands, but workload had decreased for both intervention and control group.  
30 317 As hypothesized by the authors, it is possible that an increased awareness of work organization following the experiment  
31 318 may be the cause of such findings<sup>24</sup>. No effects on sickness absence were found, as opposed to von Tiele et al., where  
32 319 employees in the intervention group decreased frequency and number of days of sickness absence, as well as perceiving  
33 320 improved self-rated work ability<sup>20</sup>. Other work-related factors were reported as significantly improved after the  
34 321 experiment, including exhaustion after work, sense of collaboration between colleagues, demands, instrumental manager  
35 322 support and work intrusion on private life<sup>18,22,23</sup>. The last finding is in line with results from Anntila et al., in which shorter  
36 323 working hours were associated with positive work-family interaction<sup>29</sup>. Overall, reduced working hours seem to improve  
37 324 working-life quality.

### 38 325 **Quality of life**

39 326 Three studies evaluated the effect of work-time reduction on quality of life outside of work<sup>20,23,24</sup>. Åkerstedt et al. found  
40 327 a significant increase in time for family/friends and social activities in the experimental group, and this increase was  
41 328 significant also over time among the experimental group<sup>24</sup>. However, as mentioned above, they did not find any  
42 329 improvement in the self-rated health. It is possible that the extra free time, despite exerting a positive effect on general  
43 330 quality of life, does not necessarily determine an improvement in self-perceived health. These results are consistent with

1  
2  
3 331 the results of von Thiele et al., who did not find any significant differences regarding work-time interaction, neither  
4 332 between the intervention groups and the reference group nor over time among the same groups<sup>20</sup>. In addition, Lorentzon  
5 333 et al. found that healthy behaviours, such as healthy eating, did not improve in the intervention group<sup>23</sup>. Overall, these  
6 334 results suggest that work time reduction per se is not necessarily associated with an improvement in the balance between  
7 335 work and private life. Hence, beside work-time reduction, it is also important to focus on how the extra free time is spent,  
8 336 in order to make the reduction in work-time and workload really effective in exerting positive effects on individual health.

### 11 337 **Physical activity**

12 338 Physical activity was evaluated by three studies<sup>20,23,24</sup>. While Åkerstedt et al. found no significant improvements regarding  
13 339 physical exercise<sup>24</sup>, von Thiele et al and Lorentzon et al observed an increase in physical activity in participants  
14 340 experimenting reduced work hours<sup>20,23</sup>. However, the study design by von Thiele et al. consisted in three groups (physical  
15 341 activity group, reduced work hours group and reference group) and such increases were observed in all of them<sup>20</sup>. We do  
16 342 not know whether these changes were a consequence of an increased awareness towards physical exercise brought by the  
17 343 experiment. Moreover, the number of studies evaluating this specific outcome are too few. Although previous research  
18 344 has shown that there seems to be an inverse association between work hours and physical activity<sup>30</sup>, for the reasons listed  
19 345 above it cannot be concluded that reduced work hours are associated with increased levels of physical activity. Indeed,  
20 346 we do not know whether employees working for reduced work time would engage their spare time into physical exercise.  
21 347 Hence, more experiments are needed to better determine this subject.

### 22 348 **Biological markers**

23 349 Only von Thiele et al. evaluated the effect of work-time reduction on several biological markers<sup>20</sup>. They found in the  
24 350 reference group increasing levels of all of the blood lipids. In the reduced work hours group, total cholesterol and HDL  
25 351 had increased significantly, while only total cholesterol had increased significantly in the physical-exercise group.  
26 352 Regarding metabolic measures, glucose showed a significant decrease in the physical-exercise group only, while the  
27 353 waist-to-hip ratio increased in the reduced work hours group. These last findings suggest that the work time reduction  
28 354 alone is not sufficient to exert positive metabolic effects, but it should be associated with other healthy habits in the  
29 355 extra free time outside of work, like physical activity. that. On the other hand, in this study the increase of total  
30 356 cholesterol in the exercise group, without any significant reduction in LDL and waist-to-hip ratio, is unexpected and it  
31 357 could be related to other factors, such as diet, which this study did not analyze. Hence, it is impossible to state that a  
32 358 reduction in work hours has a significant and positive effect on biomarkers and metabolic outcomes, and other studies  
33 359 are therefore necessary to clarify these discrepancies.

### 34 360 **Strengths and limitations**

35 361 To date, this is the first literature review carried out in English to establish the relationship between reduced work hours  
36 362 and health effects. Furthermore, our review evaluates the effect of reduced working hours on both self-reported and  
37 363 measured health outcomes. Nevertheless, it has some limitations that must be acknowledged. First of all, the studies we  
38 364 included in our analysis were published in Scandinavian countries, traditionally known for placing a high value on work-  
39 365 life balance. Hence, the results of this review are not easily generalizable in other contexts, which could be different from  
40 366 a social, cultural and economic point of view. Furthermore, even taking into account excluded records, few studies  
41 367 addressed the issue of work time reduction, suggesting that, despite emerging as a relevant topic in public debate over the  
42 368 last few years, the issue of worktime reduction has not been studied enough so far. However, we could have missed some  
43 369 relevant studies, due to language limitations. In addition, three out of seven studies were evaluated as of weak quality by  
44 370 the authors. The main reason for this was the impossibility to ensure blinding of both participants and outcome assessors  
45 371 in this kind of studies. Nonetheless all of them had a longitudinal design, over a period of time ranging from 12 up to 36

1  
2  
3 372 months. Furthermore, in all studies except two, employment of extra-personnel allowed to prevent a compensatory  
4 373 increase in workload, which could have significantly undermined the effectiveness of worktime reduction.  
5  
6 374 In the end, a great limitation of our review is the remarkable heterogeneity of workers in the seven different studies.  
7 375 Most of the studies focus on health service workers and this may limit the generalizability of the review to the context of  
8  
9 376 health services that represent a particular work setting with high emotional stress.

## 10 377 11 12 378 **CONCLUSIONS**

13 379 Factors affecting health in the workplace are manifold and include organizational, cultural and social aspects. It is not  
14  
15 380 clear whether changes in working hours alone is a robust enough factor that influences "stress" or other health variables  
16 381 in workers.

17 382 However, our review shows that the reduction of work hours is associated with an improvement of sleep habits, lower  
18  
19 383 levels of stress and better working life quality. We did not find a positive influence of work time reduction neither on  
20 384 quality of life outside of work, nor on physical activity. Hence, we can conclude that a reduction of work-hours, with  
21  
22 385 preserved salary and without an increase in total workload, may exert a positive effect on specific health outcomes,  
23 386 especially stress and sleep, but it is also essential to to investigate how other work variables such as load, type and  
24  
25 387 organization of work affect the health of the worker. Another important factor that could affect health is how the extra  
26 388 free time is spent. Therefore, further studies are needed to investigate the correlation between different working variables,  
27  
28 389 working time and extra free time with standardized health outcomes in order to evaluate the real impact of working time  
29 390 on workers' health. It is also important to study whether providing prescriptions on how to spend extra free time healthily  
30 391 can improve workers' health. The conflicting results of this review suggest that work time reduction may be truly effective  
31  
32 392 only if it determines a parallel improvement in healthy habits, which can then be main responsible for a real increase of  
33 393 overall health and quality of life.

### 34 35 394 36 395 **Data availability**

37 396 All data relevant to the study are included in the article or uploaded as supplementary information.

### 38 397 39 398 40 398 **Competing interests**

41  
42 399 The authors declare that they have no conflict of interest.

### 43 400 44 45 401 **Funding**

46 402 This research did not receive any specific grant from funding agencies in the public commercial or not-for-profit sectors.

### 47 403 48 49 404 **Ethics Statement**

50 405 For this type of study Ethics Committee approval is not required.

### 51 406 52 407 **Contributorship Statement**

53 408 The review was conceived by GV, MRG and RS. Data extraction was carried out by GV, AS, DC, SR and EB with  
54 409 support from MRG, FB and RS. Reporting of findings was led by GV and MRG with support from FB and RS. All  
55 410 authors contributed to manuscript preparation and approved the final version.

57  
58  
59  
60



1  
2  
3 411 **REFERENCES**  
4 412  
5  
6 413  
7 414  
8  
9 415  
10 416  
11  
12 417  
13 418  
14  
15 419  
16 420  
17 421  
18  
19 422  
20 423  
21  
22 424  
23 425  
24  
25 426  
26 427  
27 428  
28  
29 429  
30 430  
31  
32 431  
33 432  
34  
35 433  
36 434  
37 435  
38  
39 436  
40 437  
41  
42 438  
43 439  
44  
45 440  
46 441  
47  
48 442  
49 443  
50 444  
51  
52 445  
53 446  
54  
55 447  
56 448  
57  
58 449  
59 450  
60 451

1. OECD. Average usual weekly hours worked on the main job. OECD Employment and Labour Market Statistics (database). Published 2021. Accessed January 26, 2020. [https://stats.oecd.org/Index.aspx?DataSetCode=AVE\\_HRS](https://stats.oecd.org/Index.aspx?DataSetCode=AVE_HRS)
2. OECD. Average annual hours actually worked per worker. OECD Employment and Labour Market Statistics (database). Published 2021. Accessed January 26, 2021. <https://stats.oecd.org/Index.aspx?DataSetCode=ANHRS>
3. Bannai A, Tamakoshi A. The association between long working hours and health: A systematic review of epidemiological evidence. *Scand J Work Environ Heal*. 2014;40(1):5-18. doi:10.5271/sjweh.3388
4. Kivimäki M, Jokela M, Nyberg ST, et al. Long working hours and risk of coronary heart disease and stroke: A systematic review and meta-analysis of published and unpublished data for 603 838 individuals. *Lancet*. 2015;386(10005):1739-1746. doi:10.1016/S0140-6736(15)60295-1
5. Virtanen M, Jokela M, Madsen IEH, et al. Long working hours and depressive symptoms: Systematic review and meta-analysis of published studies and unpublished individual participant data. *Scand J Work Environ Heal*. 2018;44(3):239-250. doi:10.5271/sjweh.3712
6. Rivera AS, Akanbi M, O'Dwyer LC, McHugh M. Shift work and long work hours and their association with chronic health conditions: A systematic review of systematic reviews with meta-analyses. *PLoS One*. 2020;15(4):1-19. doi:10.1371/journal.pone.0231037
7. Fagan C, Lyonette C, Smith M, Saldaña-Tejeda A. *The Influence of Working Time Arrangements on Work-Life Integration or 'Balance': A Review of the International Evidence.*; 2012.
8. Estevao M, Sa F. The 35-Hour Workweek in France: Straightjacket or Welfare Improvement? *Econ Policy*. 2008;23. doi:10.1111/j.1468-0327.2008.00204.x
9. Fagnani J, Letablier MT. Work and family life balance: The impact of the 35-hour laws in France. *Work Employ Soc*. 2004;18(3):551-572. doi:10.1177/0950017004045550
10. Bakker AB, Demerouti E. The Job Demands-Resources model: state of the art. *J Manag Psychol*. 2007;22(3):309-328. doi:10.1108/02683940710733115
11. Ferdinand P. VW Plan For 4-Day Workweek Is Adopted. *New York Times*. Published online 1993. <https://www.nytimes.com/1993/11/26/business/vw-plan-for-4day-workweek-is-adopted.html>
12. Paul K. Microsoft Japan tested a four-day work week and productivity jumped by 40%. *The Guardian*. <https://www.theguardian.com/technology/2019/nov/04/microsoft-japan-four-day-work-week-productivity>. Published 2019.
13. Charlotte G-M. A 4-Day Workweek? A Test Run Shows a Surprising Result. *New York Times*. <https://www.nytimes.com/2018/07/19/world/asia/four-day-workweek-new-zealand.html>. Published 2018.
14. Brynja O, Bildt C. Arbetstidsförkortning och hälsa: En litteraturgenomgång av befintlig forskning [Reduced working hours and health: a literature review of existing studies]. Published online 2005. [http://nile.lub.lu.se/arbarch/arb/2005/arb2005\\_11.pdf](http://nile.lub.lu.se/arbarch/arb/2005/arb2005_11.pdf)
15. Ouzzani M, Hammady H, Fedorowicz Z, Elmagarmid A. Rayyan—a web and mobile app for systematic reviews. *Syst Rev*. 2016;5(1):210. doi:10.1186/s13643-016-0384-4
16. EPHPP. Quality assessment tool for quantitative studies. *Eff Public Heal Pract Proj McMaster Univ Toronto*. 2010;(1998):1-4. [https://merst.ca/wp-content/uploads/2018/02/quality-assessment-tool\\_2010.pdf](https://merst.ca/wp-content/uploads/2018/02/quality-assessment-tool_2010.pdf)
17. Armijo-Olivo S, Stiles CR, Hagen NA, Biondo PD, Cummings GG. Assessment of study quality for systematic

- 1  
2  
3 452 reviews: a comparison of the Cochrane Collaboration Risk of Bias Tool and the Effective Public Health Practice  
4 453 Project Quality Assessment Tool: methodological research. *J Eval Clin Pract.* 2012;18(1):12-18.  
5 454 doi:10.1111/j.1365-2753.2010.01516.x  
6  
7 455 18. Barck-Holst P, Nilsson A, Åkerstedt T, Hellgren C. Reduced working hours and stress in the Swedish social  
8 456 services: A longitudinal study. *Int Soc Work.* 2017;60(4):897-913. doi:10.1177/0020872815580045  
9  
10 457 19. Schiller H, Lekander M, Rajaleid K, et al. The impact of reduced worktime on sleep and perceived stress – A  
11 458 group randomized intervention study using diary data. *Scand J Work Environ Heal.* 2017;43(2):109-116.  
12 459 doi:10.5271/sjweh.3610  
13  
14 460 20. von Thiele Schwarz U, Lindfors P, Lundberg Ui. Health-related effects of worksite interventions involving  
15 461 physical exercise and reduced workhours. *Scand J Work Environ Heal.* 2008;34(3):179-188.  
16 462 doi:10.5271/sjweh.1227  
17  
18 463 21. Von Thiele Schwarz U, Hasson H. Employee self-rated productivity and objective organizational production  
19 464 levels: Effects of worksite health interventions involving reduced work hours and physical exercise. *J Occup  
20 465 Environ Med.* 2011;53(8):838-844. doi:10.1097/JOM.0b013e31822589c2  
21  
22 466 22. Wergeland E, Veiersted B, Ingre M, et al. A shorter workday as a means of reducing the occurrence of  
23 467 musculoskeletal disorders. *Scand J Work Environ Heal.* 2003;29(1):27-34. doi:10.5271/sjweh.701  
24  
25 468 23. Lorentzon B. *23 Månader Med 6 Timmar. Följeforskning Om Försök Med Reducerad Arbetstid.*; 2017.  
26 469 24. Åkerstedt T, OLSSON B, INGRE M, Holmgren Caicedo M, Kecklund G. A 6-hour working day--effects on  
27 470 health and well-being. *J Hum Ergol (Tokyo).* 2001;30:197-202. doi:10.11183/jhe1972.30.197  
28  
29 471 25. Dallner M, Elo AL, Gamberale F, et al. Validation of the general nordic questionnaire (QPSNordic) for  
30 472 psychological and social factors at work. *Nord Counc Minist.* 2000;12.  
31  
32 473 26. Virtanen M, Ferrie JE, Gimeno D, et al. Long Working Hours and Sleep Disturbances: The Whitehall II  
33 474 Prospective Cohort Study. *Sleep.* 2009;32(6):737-745. doi:10.1093/sleep/32.6.737  
34  
35 475 27. NAKASHIMA M, MORIKAWA Y, SAKURAI M, et al. Association between long working hours and sleep  
36 476 problems in white-collar workers. *J Sleep Res.* 2011;20(1pt1):110-116. doi:10.1111/j.1365-2869.2010.00852.x  
37  
38 477 28. Åkerstedt T, Fredlund P, Gillberg M, Jansson B. Work load and work hours in relation to disturbed sleep and  
39 478 fatigue in a large representative sample. *J Psychosom Res.* 2002;53(1):585-588. doi:10.1016/s0022-  
40 479 3999(02)00447-6  
41  
42 480 29. Anttila T, Nätti J, Väisänen M. THE EXPERIMENTS OF REDUCED WORKING HOURS IN FINLAND.  
43 481 *Community Work Fam.* 2005;8(2):187-209. doi:10.1080/13668800500049704  
44  
45 482 30. Bauman AE, Reis RS, Sallis JF, et al. Correlates of physical activity: Why are some people physically active and  
46 483 others not? *Lancet.* 2012;380(9838):258-271. doi:10.1016/S0140-6736(12)60735-1  
47  
48  
49  
50

## 51 485 **Figure Legends**

52 486 **Figure 1** Systematic review: selection process. From: Moher D, Liberati A, Tetzlaff J, Altman DG, The PRISMA Group  
53 487 (2009). Preferred Reporting Items for Systematic Reviews and Meta- Analyses: The PRISMA Statement. *PLoS Med* 6(7):  
54 488 e1000097. doi:10.1371/journal.pmed1000097.  
55  
56  
57

58 490 **Table 1** Characteristics of the studies included in systematic review.  
59  
60

1  
2  
3  
4  
5  
6  
7  
8  
9  
10  
11  
12  
13  
14  
15  
16  
17  
18  
19  
20  
21  
22  
23  
24  
25  
26  
27  
28  
29  
30  
31  
32  
33  
34  
35  
36  
37  
38  
39

Identification

Screening

Eligibility

Included

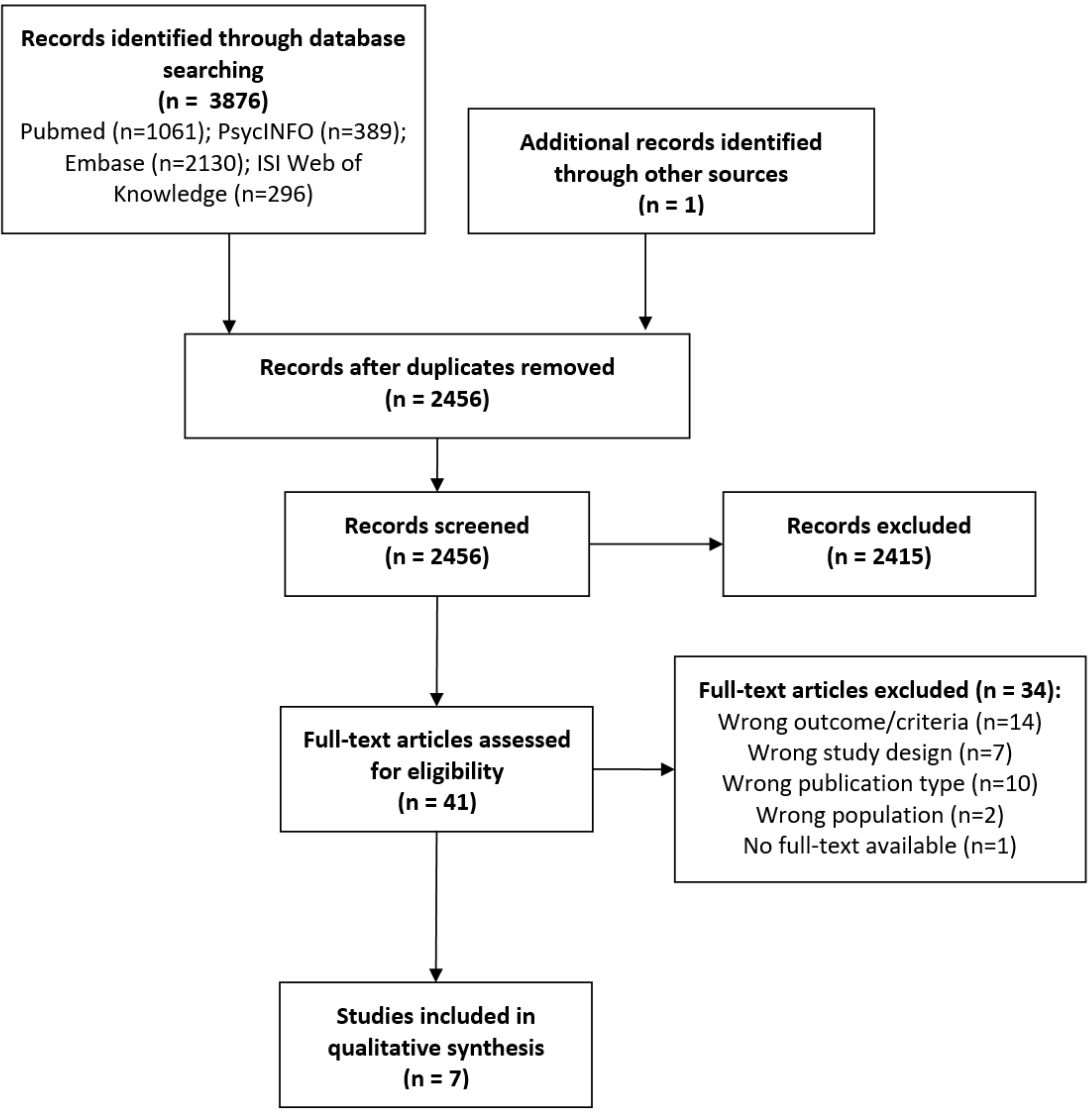

**Supplemental File 1: search strategies****MEDLINE**

("work"[Mesh] OR "Employment"[Mesh] OR work\* [Tiab] OR "Employment"[Tiab])

AND

("Mental Health"[Mesh] OR "Occupational Health"[Mesh] OR "Quality of Life/psychology"[Mesh] OR "Occupational Diseases"[Mesh] OR "quality of life"[Tiab] OR "stress" [Tiab] OR "Mental Health" [Tiab] OR "Occupational Health" [Tiab] OR "sleep" [Tiab] OR "health" [Tiab] OR "mental disorders" [Tiab] OR "psychological disorders" [Tiab] OR "insomnia" [Tiab] OR "well-being" [Tiab] OR "anxiety" [Tiab] OR "depression" [Tiab] OR "depressive disorder" [Tiab])

AND

("worktime reduction" [Tiab] OR "reduced workhours" [Tiab] OR "reduced working hours" [Tiab] OR "weekly work hours" [Tiab] OR "weekly working hours" [Tiab] OR "shorter workday"[Tiab] OR "6-hour working day" [Tiab] OR "reduced work hours"[Tiab] OR "reduced worktime"[tiab] OR "work week" [Tiab] OR "workday" [Tiab])

**PsycINFO**

(DE "Work Load" OR DE "Work Scheduling" OR DE "Workplace intervention" OR TI "work" OR AB "work")

AND

(DE "Mental Health" OR DE "Occupational Health" OR DE "Mental Disorders" OR DE "Occupational Stress" OR DE "Quality of life" OR TI "Stress" OR AB "Stress" OR TI "Mental Health" OR AB "Mental Health" OR TI "Occupational Health" OR AB "Occupational Health" OR TI "sleep" OR AB "sleep" OR TI "health" OR AB "health" OR TI "mental disorder\*" OR AB "mental disorders" OR TI "psychological disorders" OR AB "psychological disorders" OR TI "insomnia" OR AB "insomnia" OR TI "well-being" OR AB "well-being" OR TI "anxiety" OR AB "anxiety" OR TI "depression" OR AB "depression" OR TI "depressive disorder" OR AB "depressive disorder")

AND

(TI "worktime reduction" OR AB "worktime reduction" OR TI "reduced workhours" OR AB "reduced workhours" OR TI "reduced working hours" OR AB "reduced working hours" OR TI "weekly work hours" OR AB "weekly work hours" OR TI "weekly working hours" OR AB "weekly working hours" OR TI "shorter workday" OR AB "shorter workday" OR TI "6-hour working day" OR AB "6-hour working day" OR TI "reduced work hours" OR AB "reduced work hours" OR TI "reduced worktime" OR AB "reduced worktime" OR TI "work week" OR AB "work week" OR TI "workday" OR AB "workday")

**EMBASE**

('work'/exp OR work\*:ti,ab,kw OR 'employment'/exp OR 'employment':ti,ab,kw)

AND

('mental health'/exp OR 'occupational health'/exp OR 'quality of life'/exp OR 'occupational disease'/exp OR 'quality of life':ti,ab,kw OR 'stress':ti,ab,kw OR 'Mental Health':ti,ab,kw OR 'Occupational Health':ti,ab,kw OR 'sleep':ti,ab,kw OR 'health':ti,ab,kw OR 'mental disorders':ti,ab,kw OR 'psychological disorders':ti,ab,kw OR 'insomnia':ti,ab,kw OR 'well-being':ti,ab,kw OR 'anxiety':ti,ab,kw OR 'depression':ti,ab,kw OR 'depressive disorder':ti,ab,kw)

AND

('worktime reduction':ti,ab,kw OR 'reduced workhours':ti,ab,kw OR 'reduced working hours':ti,ab,kw OR 'weekly work hours':ti,ab,kw OR 'weekly working hours':ti,ab,kw OR 'shorter workday':ti,ab,kw OR '6-hour working

1  
2  
3 day':ti,ab,kw OR 'reduced work hours':ti,ab,kw OR 'reduced worktime':ti,ab,kw OR 'work week':ti,ab,kw OR  
4 'workday':ti,ab,kw)  
5

6 **WEB OF SCIENCE**  
7

8 (job OR work\*OR Employment)  
9

10 AND  
11

12 ("quality of life" OR "stress" OR "Mental Health" OR "Occupational Health" OR "sleep" OR "health" OR "mental  
13 disorders" OR "psychological disorders" OR "insomnia" OR "well-being" OR "anxiety" OR "depression" OR  
14 "depressive disorder")  
15

16 AND  
17

18 ("worktime reduction" OR "reduced workhours" OR "reduced working hours" OR "weekly work hours" OR "weekly  
19 working hours" OR "shorter workday" OR "6-hour working day" OR "reduced work hours" OR "reduced worktime"  
20 OR "work week" OR "workday")  
21  
22  
23  
24  
25  
26  
27  
28  
29  
30  
31  
32  
33  
34  
35  
36  
37  
38  
39  
40  
41  
42  
43  
44  
45  
46  
47  
48  
49  
50  
51  
52  
53  
54  
55  
56  
57  
58  
59  
60

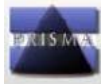

## PRISMA 2020 Checklist

| Section and Topic             | Item # | Checklist item                                                                                                                                                                                                                                                                                       | Location where item is reported |
|-------------------------------|--------|------------------------------------------------------------------------------------------------------------------------------------------------------------------------------------------------------------------------------------------------------------------------------------------------------|---------------------------------|
| <b>TITLE</b>                  |        |                                                                                                                                                                                                                                                                                                      |                                 |
| Title                         | 1      | Identify the report as a systematic review.                                                                                                                                                                                                                                                          | p.1 line 4                      |
| <b>ABSTRACT</b>               |        |                                                                                                                                                                                                                                                                                                      |                                 |
| Abstract                      | 2      | See the PRISMA 2020 for Abstracts checklist.                                                                                                                                                                                                                                                         |                                 |
| <b>INTRODUCTION</b>           |        |                                                                                                                                                                                                                                                                                                      |                                 |
| Rationale                     | 3      | Describe the rationale for the review in the context of existing knowledge.                                                                                                                                                                                                                          | p. 3 lines 97-119               |
| Objectives                    | 4      | Provide an explicit statement of the objective(s) or question(s) the review addresses.                                                                                                                                                                                                               | p. 4 lines 119-121              |
| <b>METHODS</b>                |        |                                                                                                                                                                                                                                                                                                      |                                 |
| Eligibility criteria          | 5      | Specify the inclusion and exclusion criteria for the review and how studies were grouped for the syntheses.                                                                                                                                                                                          | p. 4 lines 135-147              |
| Information sources           | 6      | Specify all databases, registers, websites, organisations, reference lists and other sources searched or consulted to identify studies. Specify the date when each source was last searched or consulted.                                                                                            | p. 4 lines 126-128              |
| Search strategy               | 7      | Present the full search strategies for all databases, registers and websites, including any filters and limits used.                                                                                                                                                                                 | p. 4 lines 128-133              |
| Selection process             | 8      | Specify the methods used to decide whether a study met the inclusion criteria of the review, including how many reviewers screened each record and each report retrieved, whether they worked independently, and if applicable, details of automation tools used in the process.                     | p. 4 lines 128-133              |
| Data collection process       | 9      | Specify the methods used to collect data from reports, including how many reviewers collected data from each report, whether they worked independently, any processes for obtaining or confirming data from study investigators, and if applicable, details of automation tools used in the process. | p. 4 lines 145-147              |
| Data items                    | 10a    | List and define all outcomes for which data were sought. Specify whether all results that were compatible with each outcome domain in each study were sought (e.g. for all measures, time points, analyses), and if not, the methods used to decide which results to collect.                        | p. 11 lines 171-173             |
|                               | 10b    | List and define all other variables for which data were sought (e.g. participant and intervention characteristics, funding sources). Describe any assumptions made about any missing or unclear information.                                                                                         | pp. 10-11 lines 162-171         |
| Study risk of bias assessment | 11     | Specify the methods used to assess risk of bias in the included studies, including details of the tool(s) used, how many reviewers assessed each study and whether they worked independently, and if applicable, details of automation tools used in the process.                                    | pp. 12-13 lines 247-255         |
| Effect measures               | 12     | Specify for each outcome the effect measure(s) (e.g. risk ratio, mean difference) used in the synthesis or presentation of results.                                                                                                                                                                  | pp. 4-12 lines 150-245          |
| Synthesis methods             | 13a    | Describe the processes used to decide which studies were eligible for each synthesis (e.g. tabulating the study intervention characteristics and comparing against the planned groups for each synthesis (item #5)).                                                                                 | p. 4 lines 135-147              |
|                               | 13b    | Describe any methods required to prepare the data for presentation or synthesis, such as handling of missing summary statistics, or data conversions.                                                                                                                                                | N/A                             |
|                               | 13c    | Describe any methods used to tabulate or visually display results of individual studies and syntheses.                                                                                                                                                                                               | p. 5 lines 157-158              |

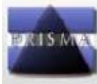

## PRISMA 2020 Checklist

| Section and Topic             | Item # | Checklist item                                                                                                                                                                                                                                                                       | Location where item is reported |
|-------------------------------|--------|--------------------------------------------------------------------------------------------------------------------------------------------------------------------------------------------------------------------------------------------------------------------------------------|---------------------------------|
|                               | 13d    | Describe any methods used to synthesize results and provide a rationale for the choice(s). If meta-analysis was performed, describe the model(s), method(s) to identify the presence and extent of statistical heterogeneity, and software package(s) used.                          | p. 5 lines 157-158              |
|                               | 13e    | Describe any methods used to explore possible causes of heterogeneity among study results (e.g. subgroup analysis, meta-regression).                                                                                                                                                 | N/A                             |
|                               | 13f    | Describe any sensitivity analyses conducted to assess robustness of the synthesized results.                                                                                                                                                                                         | N/A                             |
| Reporting bias assessment     | 14     | Describe any methods used to assess risk of bias due to missing results in a synthesis (arising from reporting biases).                                                                                                                                                              | N/A                             |
| Certainty assessment          | 15     | Describe any methods used to assess certainty (or confidence) in the body of evidence for an outcome.                                                                                                                                                                                | N/A                             |
| <b>RESULTS</b>                |        |                                                                                                                                                                                                                                                                                      |                                 |
| Study selection               | 16a    | Describe the results of the search and selection process, from the number of records identified in the search to the number of studies included in the review, ideally using a flow diagram.                                                                                         | p. 5 lines 155-157              |
|                               | 16b    | Cite studies that might appear to meet the inclusion criteria, but which were excluded, and explain why they were excluded.                                                                                                                                                          | /                               |
| Study characteristics         | 17     | Cite each included study and present its characteristics.                                                                                                                                                                                                                            | pp. 11-12 lines 174-245         |
| Risk of bias in studies       | 18     | Present assessments of risk of bias for each included study.                                                                                                                                                                                                                         | pp. 5-10 Table 1                |
| Results of individual studies | 19     | For all outcomes, present, for each study: (a) summary statistics for each group (where appropriate) and (b) an effect estimate and its precision (e.g. confidence/credible interval), ideally using structured tables or plots.                                                     | pp. 5-10 Table 1                |
| Results of syntheses          | 20a    | For each synthesis, briefly summarise the characteristics and risk of bias among contributing studies.                                                                                                                                                                               | pp. 5-10 Table 1                |
|                               | 20b    | Present results of all statistical syntheses conducted. If meta-analysis was done, present for each the summary estimate and its precision (e.g. confidence/credible interval) and measures of statistical heterogeneity. If comparing groups, describe the direction of the effect. | N/A                             |
|                               | 20c    | Present results of all investigations of possible causes of heterogeneity among study results.                                                                                                                                                                                       | N/A                             |
|                               | 20d    | Present results of all sensitivity analyses conducted to assess the robustness of the synthesized results.                                                                                                                                                                           | N/A                             |
| Reporting biases              | 21     | Present assessments of risk of bias due to missing results (arising from reporting biases) for each synthesis assessed.                                                                                                                                                              | N/A                             |
| Certainty of evidence         | 22     | Present assessments of certainty (or confidence) in the body of evidence for each outcome assessed.                                                                                                                                                                                  | N/A                             |
| <b>DISCUSSION</b>             |        |                                                                                                                                                                                                                                                                                      |                                 |
| Discussion                    | 23a    | Provide a general interpretation of the results in the context of other evidence.                                                                                                                                                                                                    | pp. 13-15 lines 265-352         |
|                               | 23b    | Discuss any limitations of the evidence included in the review.                                                                                                                                                                                                                      | p. 15 lines 356-369             |
|                               | 23c    | Discuss any limitations of the review processes used.                                                                                                                                                                                                                                | p. 15 lines 361-362             |
|                               | 23d    | Discuss implications of the results for practice, policy, and future research.                                                                                                                                                                                                       | pp. 15-16                       |

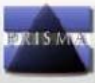

# PRISMA 2020 Checklist

1  
2  
3  
4  
5  
6  
7  
8  
9  
10  
11  
12  
13  
14  
15  
16  
17  
18  
19  
20  
21  
22  
23  
24  
25  
26  
27  
28  
29  
30  
31  
32  
33  
34  
35  
36  
37  
38  
39  
40  
41  
42  
43  
44  
45  
46  
47

| Section and Topic                              | Item # | Checklist item                                                                                                                                                                                                                             | Location where item is reported |
|------------------------------------------------|--------|--------------------------------------------------------------------------------------------------------------------------------------------------------------------------------------------------------------------------------------------|---------------------------------|
|                                                |        |                                                                                                                                                                                                                                            | lines 372-386                   |
| <b>OTHER INFORMATION</b>                       |        |                                                                                                                                                                                                                                            |                                 |
| Registration and protocol                      | 24a    | Provide registration information for the review, including register name and registration number, or state that the review was not registered.                                                                                             | N/A                             |
|                                                | 24b    | Indicate where the review protocol can be accessed, or state that a protocol was not prepared.                                                                                                                                             | N/A                             |
|                                                | 24c    | Describe and explain any amendments to information provided at registration or in the protocol.                                                                                                                                            | N/A                             |
| Support                                        | 25     | Describe sources of financial or non-financial support for the review, and the role of the funders or sponsors in the review.                                                                                                              | p. 16 line 392                  |
| Competing interests                            | 26     | Declare any competing interests of review authors.                                                                                                                                                                                         | p. 16 line 389                  |
| Availability of data, code and other materials | 27     | Report which of the following are publicly available and where they can be found: template data collection forms; data extracted from included studies; data used for all analyses; analytic code; any other materials used in the review. | p.4 line 129                    |

From: Page MJ, McKenzie JE, Bossuyt PM, Boutron I, Hoffmann TC, Mulrow CD, et al. The PRISMA 2020 statement: an updated guideline for reporting systematic reviews. *BMJ* 2021;372:n71. doi: 10.1136/bmj.n71  
 For more information, visit: <http://www.prisma-statement.org/>



# BMJ Open

## How the reduction of working hours could influence health outcomes: a systematic review of published studies

|                                 |                                                                                                                                                                                                                                                                                                                                                                                                                                                                                                                                                                                                                                                                                                                                                |
|---------------------------------|------------------------------------------------------------------------------------------------------------------------------------------------------------------------------------------------------------------------------------------------------------------------------------------------------------------------------------------------------------------------------------------------------------------------------------------------------------------------------------------------------------------------------------------------------------------------------------------------------------------------------------------------------------------------------------------------------------------------------------------------|
| Journal:                        | <i>BMJ Open</i>                                                                                                                                                                                                                                                                                                                                                                                                                                                                                                                                                                                                                                                                                                                                |
| Manuscript ID                   | bmjopen-2021-051131.R2                                                                                                                                                                                                                                                                                                                                                                                                                                                                                                                                                                                                                                                                                                                         |
| Article Type:                   | Original research                                                                                                                                                                                                                                                                                                                                                                                                                                                                                                                                                                                                                                                                                                                              |
| Date Submitted by the Author:   | 13-Feb-2022                                                                                                                                                                                                                                                                                                                                                                                                                                                                                                                                                                                                                                                                                                                                    |
| Complete List of Authors:       | Voglino, Gianluca; University of Turin, Department of Public Health<br>Savatteri, Armando; University of Turin, Department of Public Health and Paediatric Sciences<br>Gualano, Maria; University of Turin, Department of Public Health and Paediatric Sciences<br>Catozzi, Dario; University of Turin, Department of Public Health<br>Rousset, Stefano; University of Turin, Department of Public Health and Paediatric Sciences<br>Boietti, Edoardo; University of Turin, Department of Public Health and Paediatric Sciences<br>Bert, Fabrizio; University of Turin, Department of Public Health; University Hospital City of Science and Health Turin<br>Siliquini, Roberta; Università degli Studi di Torino, Department of Public Health |
| <b>Primary Subject Heading</b>: | Occupational and environmental medicine                                                                                                                                                                                                                                                                                                                                                                                                                                                                                                                                                                                                                                                                                                        |
| Secondary Subject Heading:      | Public health, Health policy                                                                                                                                                                                                                                                                                                                                                                                                                                                                                                                                                                                                                                                                                                                   |
| Keywords:                       | OCCUPATIONAL & INDUSTRIAL MEDICINE, PUBLIC HEALTH, Health & safety < HEALTH SERVICES ADMINISTRATION & MANAGEMENT, Health policy < HEALTH SERVICES ADMINISTRATION & MANAGEMENT                                                                                                                                                                                                                                                                                                                                                                                                                                                                                                                                                                  |
|                                 |                                                                                                                                                                                                                                                                                                                                                                                                                                                                                                                                                                                                                                                                                                                                                |

SCHOLARONE™  
Manuscripts



I, the Submitting Author has the right to grant and does grant on behalf of all authors of the Work (as defined in the below author licence), an exclusive licence and/or a non-exclusive licence for contributions from authors who are: i) UK Crown employees; ii) where BMJ has agreed a CC-BY licence shall apply, and/or iii) in accordance with the terms applicable for US Federal Government officers or employees acting as part of their official duties; on a worldwide, perpetual, irrevocable, royalty-free basis to BMJ Publishing Group Ltd ("BMJ") its licensees and where the relevant Journal is co-owned by BMJ to the co-owners of the Journal, to publish the Work in this journal and any other BMJ products and to exploit all rights, as set out in our [licence](#).

The Submitting Author accepts and understands that any supply made under these terms is made by BMJ to the Submitting Author unless you are acting as an employee on behalf of your employer or a postgraduate student of an affiliated institution which is paying any applicable article publishing charge ("APC") for Open Access articles. Where the Submitting Author wishes to make the Work available on an Open Access basis (and intends to pay the relevant APC), the terms of reuse of such Open Access shall be governed by a Creative Commons licence – details of these licences and which [Creative Commons](#) licence will apply to this Work are set out in our licence referred to above.

Other than as permitted in any relevant BMJ Author's Self Archiving Policies, I confirm this Work has not been accepted for publication elsewhere, is not being considered for publication elsewhere and does not duplicate material already published. I confirm all authors consent to publication of this Work and authorise the granting of this licence.

1  
2  
3 1 **Title page**

4 2  
5 3  
6 3 **Title:**

7 4 How the reduction of working hours could influence health outcomes: a systematic review of published studies  
8  
9 5

10 6 **Authors:**

11 7 Gianluca Voglino<sup>1</sup>, Armando Savatteri<sup>1</sup>, Maria Rosaria Gualano<sup>1</sup>, Dario Catozzi<sup>1</sup>, Stefano Rousset<sup>1</sup>, Edoardo Boietti<sup>1</sup>,  
12 8 Fabrizio Bert<sup>1</sup>, Roberta Siliquini<sup>1,2</sup>  
13  
14 9

15  
16 10 <sup>1</sup>Department of Public Health and Paediatric Sciences, University of Turin, Torino, Italy.

17 11 <sup>2</sup>A.O.U. City of Health and Science of Turin, Turin, Italy.  
18  
19 12

20 13 **Corresponding author:**

21 14 Maria Rosaria Gualano, Via Santena 5 bis, 10126, Turin, Italy

22 15 Email: mariarosaria.gualano@unito.it  
23  
24 16  
25

26 17 **Word count:** 4483  
27  
28 18  
29 19  
30 20  
31 21  
32 22  
33 23  
34 24  
35 25  
36 26  
37 27  
38 28  
39 29  
40 30  
41 31  
42 32  
43 33  
44 34  
45 35  
46 36  
47 37  
48 38  
49 39  
50 40  
51 41  
52  
53  
54  
55  
56  
57  
58  
59  
60  
61

1  
2  
3  
4  
5  
6  
7  
8  
9  
10  
11  
12  
13  
14  
15  
16  
17  
18  
19  
20  
21  
22  
23  
24  
25  
26  
27  
28  
29  
30  
31  
32  
33  
34  
35  
36  
37  
38  
39  
40  
41  
42  
43  
44  
45  
46  
47  
48  
49  
50  
51  
52  
53  
54  
55  
56  
57  
58  
59  
60

## ABSTRACT

### Objectives

The health effects of worktime arrangements have been largely studied for long working hours, whereas a lack of knowledge remains regarding the potential health impact of reduced worktime interventions. Therefore, we conducted this review in order to assess the relationships between worktime reduction and health outcomes.

### Design

Systematic review of published studies. Medline, PsycInfo, Embase and Web of Science databases were searched from January 2000 up to November 2019.

### Outcomes

The primary outcome was the impact of reduced working time with retained salary on health effects. Interventional and observational studies providing a quantitative analysis of any health-related outcome were included. Studies with qualitative research methods were excluded.

### Results

A total of 3876 published articles were identified and 7 studies were selected for the final analysis, all with a longitudinal interventional design. The sample size ranged from 63 participants to 580 workers, mostly from healthcare settings. Two studies assessed a work-time reduction to 6 hours per day; two studies evaluated a weekly work-time reduction of 25%; two studies evaluated simultaneously a reduced weekly work-time reduction proportionally to the amount of time worked and a 2.5 hours of physical activity program per week instead of work time; one study assessed a reduced weekly work-time reduction from 39 to 30 hours per week. A positive relationship between reduced working hours and working life quality, sleep and stress was observed. It is unclear whether work time reduction determined an improvement in general health outcomes, such as self-perceived health and well-being.

### Conclusions

These findings suggest that the reduction of working hours with retained salary could be an effective workplace intervention for the improvement of employees' well-being, especially regarding stress and sleep. Further studies in different contexts are needed to better evaluate the impact of worktime reduction on other health outcomes

**Keywords:** working hours; well-being; reducing worktime; working life quality

### Strengths and limitations

- This is the first systematic review carried out in English to evaluate the impact of reduced working hours on both self-reported and measured health outcomes.
- All of the included studies had a longitudinal design, and in all studies except two the employment of extra-personnel allowed to prevent a compensatory increase in workload, which may have limited the effectiveness of worktime reduction.
- The included studies were carried out in the Scandinavian setting, thus limiting the generalizability of the results in other contexts, different from a social, cultural and economic point of view.

- Three out of seven studies had a weak quality according to the authors, and most of the studies were carried out in the healthcare setting.

## INTRODUCTION

In Organization for Economic Cooperation and Development (OECD) countries the average working week consists of 37 hours<sup>1</sup>. OECD Data on annual average working hours show that, despite a declining trend in the amount of worked hours, many Countries still exceed the standard<sup>2</sup>. Working long hours is widely recognized as detrimental for employees' health. Indeed, several studies investigating the health effects of working overtime reported concerning findings, including increased risk of stroke, coronary heart disease, anxiety, depression, sleep disorders and adverse pregnancy outcomes in women<sup>3-5</sup>. Furthermore, a systematic assessment of evidence in literature with meta-analyses conducted by Rivera et al. found moderate-grade evidence linking long work-hours with stroke and low-grade evidence on the association between long work-hours with coronary disease, depression and pregnancy complications, including low birth weight babies and preterm delivery<sup>6</sup>. Long working hours have also been associated with reduced levels of work-life balance and increased work-family conflict<sup>7</sup>.

Conversely, the effects of reduced work-hours have not been extensively examined as for long work-hours so far. Indeed, several experiments of reducing working time have been conducted throughout the years, both in the public and private sector. One of the most notable examples was the adoption of the "35-hour Workweek" between 1998 and 2000 by the French Government, which allowed the reduction of weekly working hours from 39 to 35, with the aim of fighting the high unemployment rates. However, aside from two surveys examining employees' satisfaction with modified work-hours and their work-family conflict, no other impacts on health and well-being have been evaluated<sup>8,9</sup>. The authors argue that the French 35-hours law increased overall dissatisfaction with modified work hours among employees, mainly because it did not take into account the heterogeneity of work organization. It appears that employees increased workload to maintain high productivity. Indeed, reducing working time without employing extra-personnel may compromise the fine balance between job demand and resources, which in turn would undermine employees' wellbeing<sup>10</sup>. Further interventions have been carried out on a company level. In Germany, Volkswagen reduced the working week from 36 to 28.8 hours<sup>11</sup> and more recently, Microsoft Japan tested a four-days work week<sup>12</sup>. Similarly, Perpetual Guardian, a New Zealand firm operating in the management of trusts, wills and estates, ran a four-day work week trial for all its 240 employees<sup>13</sup>. Although companies reported successful results, they did not take into consideration the potential health impact of these experiences.

Besides, there are few studies even in scientific literature that investigate the role of reduced work hours on workers' health. To our knowledge, only one literature review was conducted in 2005 and authors concluded that no relevant effects on health were observed<sup>14</sup>. However, the review was published in Swedish, hence it may represent an issue due to language barriers. Furthermore, the studies included in their work were mostly reports from Swedish ministerial committees and critical reviews on work time arrangements. Indeed, in the studies published before 2000 authors were primarily interested in the economic consequences of reducing work-hours, exploring the feasibility of the project, and little attention was paid to the effects of worktime reduction on the health of employees. Since 2000, several interventional studies have been published. Therefore, we decided to conduct a review of the literature examining studies focusing on the relationship between reduced working hours and health effects, published since 2000, in which employees retained their salary and proportionally decreased their work time and workload.

1

2

**3 124 METHODS****4 125 Search strategy**

6 126 Following the Preferred Reporting Items for Systematic Reviews and Meta-Analyses (PRISMA) checklist we carried out  
7 127 a literature search for articles published in Medline, PsycInfo, Embase and Web of Science databases from January 2000  
8 128 up to November 2019. Search terms included terms like “work”, “health”, “well-being”, “mental-health”, “worktime  
10 129 reduction”, “reduced work hours”. Full search strings for each database are provided in supplemental file 1. First,  
11 130 duplicates were excluded. Next, AS, DC, EB and GV independently screened retrieved sources by title and abstract  
13 131 following inclusion criteria. The same authors, always in an independent fashion, performed a full text review. Finally,  
14 132 consensus was reached through discussion about uncertain cases between all reviewers. Authors chose Rayyan QCRI as  
15 133 a tool for selecting and extracting relevant records<sup>15</sup>.

**17 134 Inclusion and exclusion criteria**

19 135 We decided to include primary sources in any form, both interventional and observational studies, provided that  
20 136 quantitative analysis of any health-related outcome were performed. Hence, studies with qualitative research methods  
21 137 were excluded because we were interested on the effects of the interventions in terms of quantitatively measured  
23 138 outcomes. Articles had to investigate the association between reduced working time with retained salary and health  
24 139 effects, without excluding beforehand any category of workers. No salary reduction was considered crucial in order to  
26 140 avoid a selection bias possibly leading to exclude low-income workers. Another inclusion criterion was the replacement  
27 141 of working activity with any workplace-based intervention, provided that the amount of work hours was effectively  
29 142 reduced. Conversely, studies specifically focused on worktime reduction policies regarding activities with excessively  
30 143 long working hours, such as medical residency, were not consistent with the concept of reduced working hours and  
32 144 retained salary and were therefore excluded from our work. No language restriction was set. Due to the heterogeneity in  
33 145 the outcomes evaluated by the studies selected, a meta-analysis of data could not be conducted. Data and information  
34 146 regarding study design, Country, participant characteristics, observation period, intervention description, outcomes  
36 147 measured and results were extracted and synthesized in a systematic literature review.

**37 148 Quality assessment**

39 149 The quality of the included studies was assessed using the “Quality Assessment Tool for Quantitative Studies” developed  
40 150 by the Effective Public Health Practice Project (EPHPP)<sup>16</sup>. This quality appraisal tool provides a standardized means to  
42 151 assess study quality and develop recommendations for study findings considering eight components of study  
43 152 methodology: selection bias, study design, presence of confounders, blinding of participants and outcome assessors,  
44 153 validity and reliability of data collection methods and study dropouts and withdrawals. The overall quality of each study  
46 154 is then expressed as weak, moderate or strong. Previous evaluation of the tool has shown it to be valid and reliable<sup>17</sup>. Two  
47 155 reviewers, namely AS and SR, independently performed quality assessment. Discrepancies between the reviewers, such  
49 156 as differences in interpretation of criteria and studies, were resolved by discussion in order to reach consensus.

50 157

**52 158 Patient and Public Involvement**

53 159 No patient involved. Results will be disseminated throughout conferences and social media in order to enrich public  
54 160 debate on health outcomes of working hours rearrangements.

56 161

58 162

59 162

60 163

## RESULTS

As results of the bibliographic search, a total of 3876 published articles were identified (**Figure 1**).

**[Figure 1].**

Duplicates were excluded and remaining 2456 records were reviewed. A full-text review was conducted on 40 articles. Finally, after evaluating the inclusion criteria, 7 articles were selected (1 article was originally added by citation chasing). In total 7 articles, with a longitudinal interventional design, were included in the final analysis<sup>18-24</sup>. A brief summary of included articles is provided in **Table 1**.

The included studies were published between 2001<sup>24</sup> and 2017<sup>18,19,23</sup> and they were performed in northern Europe<sup>18-24</sup>. The sample size ranged from 63 participants<sup>24</sup> to 580 workers<sup>19</sup>, mostly from healthcare settings<sup>20-24</sup>. Only one of the included studies enrolled workers from different workplaces in the public sector (Schiller et al. 2017)<sup>19</sup>. All the studies included had a longitudinal design and the observation period was between 12 months<sup>20-22</sup> and 23 months<sup>23</sup>. Although all the studies compared the intervention group to a control group with no work-time modifications, the intervention examined were different. In particular, two studies assessed a work-time reduction to 6 hours per day<sup>22,23</sup>, two studies evaluated a weekly work-time reduction of 25%<sup>18,19</sup>, two studies evaluated simultaneously a reduced weekly work-time reduction proportionally to the amount of time worked (reduced work hours group) and a 2.5 hours per week physical activity instead of work time program (physical exercise group)<sup>20,21</sup> and one study assessed a reduced weekly work-time reduction from 39 to 30 hours per week<sup>24</sup>. The included studies assessed a variety of different outcomes. In particular general symptoms<sup>20,23,24</sup>, neuro-psychological symptoms<sup>18,23,24</sup>, working life quality<sup>18,20-24</sup>, quality of life<sup>18,23,24</sup>, physical activity<sup>20,23,24</sup>, sleep<sup>18,19,23,24</sup>, musculoskeletal disorders<sup>20,22,23</sup> and biological markers<sup>20</sup> were assessed. After quality assessment phase, overall quality was found to be strong for three studies<sup>19,20,21</sup>, moderate for one study<sup>23</sup> and weak for three studies<sup>22,23,24</sup>.

In particular, Åkerstedt and colleagues performed a longitudinal cohort study in 5 different healthcare settings, in order to compare the effects of work-hours reduction among health care and day care nursery personnel<sup>24</sup>. The study involved a total of 63 nurses, 41 in the experimental group, a 9 hours reduction of the working week from 39 hours per week to 30 hours, retaining full pay, and 22 in the control group. The experimental group showed a significant improvement for heart/respiratory symptoms, mental fatigue, sleep quality, time for social, time for family/friends, influence on work-hours and satisfaction with work-hours. Additionally, most of these variables also showed a significant change over time. Furthermore, there was a positive change over time for pain/ache complaints, nervous symptoms, gastrointestinal complaints, insomnia complaints, refreshed at awakening, sleepiness at work/leisure time, involuntary sleep at work and leisure time and satisfaction with the work situation. On the contrary, no significant interaction was found between reduced work hours and exercise, weight and BMI<sup>24</sup>.

Similar results were published by Barck-Holst and colleagues<sup>18</sup>. They performed a longitudinal quasi experimental study involving seven public social service agencies. Employees in the intervention group reduced their work hours by 25% but retained their previous salary and their organizations were fully reimbursed and staff to compensate the loss of work hours was hired. After controlling for baseline values, gender and age, there was a significant difference in change over time between intervention and control group during workdays on the restorative sleep index, average stress level, the stress index, the memory difficulties index, the negative emotion index, average sleepiness and the fatigue and exhaustion index<sup>18</sup>.

Table 1. Characteristics of the studies included in systematic review.

| Author                               | Study Design                    | Country & Participants                                                                     | Observation period | Intervention description                                                                                                                                                                            | Outcome (measures)                                                                                                                                                                                                                                                                                                                                                       | Results                                                                                                                                                                                                                                                                                                                                                                                                                                                   | Quality assessment rating |
|--------------------------------------|---------------------------------|--------------------------------------------------------------------------------------------|--------------------|-----------------------------------------------------------------------------------------------------------------------------------------------------------------------------------------------------|--------------------------------------------------------------------------------------------------------------------------------------------------------------------------------------------------------------------------------------------------------------------------------------------------------------------------------------------------------------------------|-----------------------------------------------------------------------------------------------------------------------------------------------------------------------------------------------------------------------------------------------------------------------------------------------------------------------------------------------------------------------------------------------------------------------------------------------------------|---------------------------|
| Akersredt et al, 2001 <sup>24</sup>  | Longitudinal intervention study | Sweden, N = 63, full-time workers in health care service.                                  | 36 Months          | Intervention group (N=41): reduced WWH from 39 hrs/week to 30 hrs/week.<br>Control group (N=22): unchanged working time.                                                                            | <ul style="list-style-type: none"> <li>– <b>General symptoms,</b></li> <li>– <b>neuro-psychological symptoms,</b></li> <li>– <b>working life quality,</b></li> <li>– <b>quality of life,</b></li> <li>– <b>physical activity,</b></li> <li>– <b>sleep</b></li> </ul>                                                                                                     | Subjective sleep quality (SSQ), mental fatigue and heart/respiratory symptoms, time for social activity, time for family and friends improved significantly more in the experimental group than in the control group. No significant effects for sickness absence or self-rated health.                                                                                                                                                                   | Weak                      |
| Wergeland et al, 2003 <sup>22</sup>  | Longitudinal intervention study | Norway and Sweden, N = 403. Workers in nursing homes, home care services and kindergartens | 12-22 Months       | Intervention group: reduced DWH to 6 hrs/day.<br>Reference group: unchanged working time.                                                                                                           | <ul style="list-style-type: none"> <li>– <b>Musculoskeletal disorders,</b> (shoulder-neck and back pain frequency and work-related physical exhaustion)</li> <li>– <b>working life quality</b></li> </ul>                                                                                                                                                                | A significant interaction was found for neck-shoulder pain and for exhaustion after work in the intervention group. No significant effects were observed in the reference group.                                                                                                                                                                                                                                                                          | Weak                      |
| von Thiele et al, 2008 <sup>20</sup> | Longitudinal intervention study | Sweden, N = 177 employees from 6 workplaces at public dental health care organization      | 12 Months          | PE group: 2.5 hrs/week of physical activity instead of work time.<br>Reduced work hours group: reduced WWH proportionally to the amount of time worked.<br>Reference group: unchanged working time. | <ul style="list-style-type: none"> <li>– <b>General symptoms,</b></li> <li>– <b>musculoskeletal disorders,</b></li> <li>– <b>working life quality</b> (work-home interference, recovery from work and work ability),</li> <li>– <b>physical activity</b></li> <li>– <b>biological markers</b> (blood lipids, neuroendocrine markers, cardiovascular measures)</li> </ul> | Physical activity level increased in all three groups but significantly more in PE group. Glucose levels and upper-extremity disorders were found to be significantly decreased in the exercise group, while a significant increase in HDL and waist-to-hip ratio was found among those working reduced hours. Participants working reduced hours also had significantly increased total cholesterol, while no changes in LDL-to-HDL ratio were recorded. | Strong                    |
| von Thiele et al, 2011 <sup>21</sup> | Longitudinal intervention study | Sweden, N = 177 employees from 6 workplaces at a public dental health care organization    | 12 Months          | PE group: 2.5 hrs/week of physical activity instead of work time.<br>Reduced work hours group: reduced WWH proportionally to the amount of time worked.                                             | <ul style="list-style-type: none"> <li>– <b>On-the-job productivity,</b></li> <li>– <b>working life quality</b> (sickness presenteeism and sickness absenteeism)</li> <li>– <b>Objective production levels</b> (administrative records)</li> </ul>                                                                                                                       | Physical activity was significantly associated with an increase in self-rated productivity in terms of increased quantity of work and work-ability and decreased frequency and number of days of sickness absence. No effect was found in the work hours reduction group. In all three groups there was an increase in the number of treated patients per                                                                                                 | Strong                    |



|                                             |                                            |                                                                           |           |                                                                                                   |                                                                                                                                                                                                                                                                                                                                               |                                                                                                                                                                                                                                                                                                                                                                                                                                                                                                                                       |          |
|---------------------------------------------|--------------------------------------------|---------------------------------------------------------------------------|-----------|---------------------------------------------------------------------------------------------------|-----------------------------------------------------------------------------------------------------------------------------------------------------------------------------------------------------------------------------------------------------------------------------------------------------------------------------------------------|---------------------------------------------------------------------------------------------------------------------------------------------------------------------------------------------------------------------------------------------------------------------------------------------------------------------------------------------------------------------------------------------------------------------------------------------------------------------------------------------------------------------------------------|----------|
|                                             |                                            |                                                                           |           | Reference group: unchanged working time.                                                          |                                                                                                                                                                                                                                                                                                                                               | therapist, significantly greater in the reduced work hours group.                                                                                                                                                                                                                                                                                                                                                                                                                                                                     |          |
| <b>Barck-Holst et al, 2017<sup>18</sup></b> | Longitudinal quasi-experimental trial      | Sweden, N= 204<br>A total of 125 participants were deemed as per protocol | 18 Months | Intervention group: reduced work hours by 25%.<br>Reference group: unchanged working time.        | – <b>Neuro-psychological symptoms</b><br>– <b>working life quality</b> (demands, control, social support, instrumental manager support, instrumental coworker support, work intrusion on private life)<br>– <b>sleep</b>                                                                                                                      | The intervention group significantly improved restorative sleep, stress, memory difficulties, negative emotion, sleepiness, fatigue and exhaustion on both work days and weekends. Improved demands, instrumental manager support and work intrusion on private life were observed to be significantly higher in the intervention group.                                                                                                                                                                                              | Moderate |
| <b>Lorentzon 2017<sup>23</sup></b>          | Longitudinal intervention study            | Sweden, N = 124, nurses working in a centre for the elderly               | 23 Months | Intervention group: work-time reduction to 6 hrs/day.<br>Reference group: unchanged working time. | – <b>General symptoms,</b><br>– <b>musculoskeletal disorders,</b><br>– <b>neuro-psychological symptoms</b> (alertness level, perceived fatigue, energy left at home, feeling calm, perceived stress),<br>– <b>working life quality</b> (collaboration and personal development, sick leaves),<br>– <b>physical activity</b><br>– <b>sleep</b> | Good perceived health and alertness level, satisfactory level of perceived fatigue. Energy left at home, feeling calm, satisfactory levels of stress, average sleep time increased in intervention group.<br>General symptoms, sleep and musculoskeletal symptoms improved in the intervention group, and dropped in the control group.<br>Collaboration and personal development improved; improved sense of collaboration between nurses.<br>Sick leave increased in the intervention group.<br>No inferential statistics provided. | Weak     |
| <b>Schiller et al, 2017<sup>19</sup></b>    | Longitudinal controlled intervention study | Sweden, N=580, workers from 33 workplaces in the public sector            | 18 Months | Intervention group: reduced WWH by 25%.<br>Reference group: unchanged working time.               | – <b>Sleep</b><br>– <b>perceived stress</b> , feeling of worries                                                                                                                                                                                                                                                                              | On workdays, the intervention group displayed significantly improved SSQ, decreased sleepiness and perceived stress, less feelings of worries and stress at bedtime when work hours were reduced. Also, a significant 23 minutes extension of sleep duration was detected.<br>The intervention showed similar positive effects on days off, except for sleep duration.                                                                                                                                                                | Strong   |

1  
2  
3 208 In addition, a longitudinal controlled intervention study evaluating a 25% reduction of weekly work hours was published  
4 209 in 2017 by Schiller and colleagues. In this paper, participants worked at 33 different workplaces, in four sectors: social  
5 210 services (n=170); technical services (n=236); care and welfare (n=159); call-center (n=71). The intervention group  
6 211 (n=370) reduced work-time to 75% with preserved salary during 18 months. Data were collected at baseline (1–2 months  
7 212 before the intervention) and approximately 9 months and 18 months after the introduction of reduced work hours. On  
8 213 workdays, the intervention group (N=354) displayed improved subjective sleep quality, 23 minutes extended sleep  
9 214 duration (over the whole period of 18 months), decreased sleepiness and perceived stress and less feelings of worries and  
10 215 stress at bedtime when work hours were reduced ( $p<0.002$ ). Gender, age, having children living at home, and baseline  
11 216 values of sleep quality and worries and stress at bedtime, considered as additional between-group factors, did not influence  
12 217 the results significantly<sup>19</sup>.

13 218 Similar outcomes were assessed in a cohort study, performed between February 2015 and December 2016 by Lorentzon  
14 219 and colleagues<sup>23</sup>. In this paper, 68 nurses from the intervention group had their working time reduced to 6 hours per day  
15 220 with retaining their full-time pay. On the contrary, nurses in the control group (N=56) had no working hours reduction.  
16 221 Outcomes were assessed using several questionnaires before, during and after the experimentation. In particular, the sick  
17 222 leave was 6.1% in the intervention group and 12.3% in the control group. Furthermore, health perceived as good (72% vs  
18 223 60%), alertness level perceived as good (65% vs 50%), satisfactory level of perceived fatigue (+20% vs -22%), feeling  
19 224 having a lot of energy left when arriving at home (51% vs 7%, both starting from 20%), feeling calm (64% vs 45%),  
20 225 satisfactory levels of stress (+20%, -5%), average sleep time (7 hours vs 5.8 hours) had better values in the intervention  
21 226 group compared to the control group. Additionally, in the intervention group, satisfaction regarding physical activity  
22 227 increased (+7% vs -15%). Finally, general symptoms, sleep and symptoms affecting the musculoskeletal system improved  
23 228 in the intervention group, and dropped for the control group<sup>23</sup>. Unfortunately, no statistical inference was provided by  
24 229 Authors.

25 230 Similarly, a previous paper assessing the occurrence of musculoskeletal disorders in the experimental and control groups  
26 231 was published by Wegerland and colleagues<sup>22</sup>. In their longitudinal intervention study, involving subjects enrolled from  
27 232 different institutions, workers in the experimental group had their daily work-hours reduced to 6 hours, with retained  
28 233 salary and extra personnel employed to compensate for the reduction in work-hours. Participants were involved through  
29 234 a self-administered questionnaire about pain in the neck-shoulder and back regions prior to and during the work-time  
30 235 reduction. By using a multivariable analysis on data from all the institutions, authors found a significant interaction for  
31 236 neck-shoulder pain ( $p=0.034$ ) and exhaustion after work ( $P=0.009$ ). No significant interaction was found for back pain.  
32 237 Additionally, the intervention group showed increased job satisfaction after the reduction in work-hours<sup>22</sup>.

33 238 Finally, von Thiele and colleagues performed two longitudinal studies in Stockholm, Sweden, involving employees from  
34 239 six workplaces in a large public dental health care organization, randomly allocated to one of three groups: physical-  
35 240 exercise group (PE), reduced work-hours group (RWH), and reference group (R)<sup>20,21</sup>. At the two workplaces acting as  
36 241 reference, no intervention was carried out; at the two workplaces in the PE group, 2.5 hours of weekly work hours were  
37 242 allocated to mandatory physical exercise on two different days; at the two workplaces in the RWH group, full-time weekly  
38 243 hours were reduced from 40 hours/week to 37.5 hours/week. All employees in the intervention groups retained their  
39 244 salaries, and no additional personnel were employed. The final sample consisted of 177 employees, mainly women.  
40 245 Participants were instructed to complete self-ratings at baseline, after 6 months and after 12 months<sup>20,21</sup>.

41 246 In the paper published in 2008<sup>20</sup> blood samples were and questionnaire were used to explore the areas of physical activity,  
42 247 recovery from work stress, work-home interference, self-related health, work ability, general and musculoskeletal  
43 248 symptoms. The results showed a significant increase in physical exercise in all three groups over time, with post-hoc tests

1  
2  
3 249 showed that the increase in the PE group was significantly greater than in the other two groups. Additionally, the analysis  
4 250 showed increasing levels of all of the blood lipids in the reference group ( $p < 0.001$ , for total cholesterol;  $p = 0.016$ , for  
5 251 triglycerides;  $p = 0.003$ , for HDL;  $p < 0.001$ , for LDL). In the RWH group, total cholesterol and HDL had increased  
6 252 significantly ( $p = 0.019$ , for total cholesterol;  $p = 0.016$ , for HDL), while only total cholesterol had increased significantly  
7 253 in the physical-exercise group ( $p = 0.018$ ). Glucose showed a significant time  $\times$  group effect ( $p = 0.04$ ), and a significant  
8 254 decrease in the PE group ( $p = 0.036$ ). Work ability decreased in the reference group ( $p = 0.005$ ); similar results were found  
9 255 for general symptoms<sup>20</sup>.

10 256 In the paper published in 2011<sup>21</sup>, three outcomes were measured: on-the-job productivity, measured with a single item  
11 257 asking the respondents to rate their current work ability as compared with their individual best work ability on a ten-point  
12 258 scale; sickness presenteeism and sickness absenteeism, assessed with three questions; objective production levels, in terms  
13 259 of the number of treated patients and the number of therapists per month for each participating worksite as well as for all  
14 260 worksites combined. The results showed a significant increase in self-rated quantity of work ( $p = 0.029$ ) and work ability  
15 261 ( $p = 0.046$ ) in the PE group. Work ability decreased significantly in the reference group ( $p = 0.004$ ). In the PE group,  
16 262 frequency of sickness absence ( $p = 0.037$ ) and sickness duration ( $p = 0.029$ ) decreased significantly. In the reference group  
17 263 changes in sickness absence duration ( $p = 0.041$ ) and sickness presenteeism ( $p = 0.028$ ) were each significant<sup>21</sup>.  
18 264  
19 265

## 20 266 **DISCUSSION**

21 267 The purpose of this review was to analyze the results of studies conducted in order to explore the consequences of work  
22 268 time reduction on health outcomes, which is an emerging and debated issue especially in western countries with a  
23 269 developed welfare system, as the ones in Northern Europe. Unfortunately, there is no standard health outcome in the  
24 270 literature that can be used as a comparison in all studies to investigate the effects of reducing working hours on workers'  
25 271 health such as self-perceived health and well-being. Then, we analysed 7 published articles exploring several different  
26 272 health outcomes, and all of them were investigated and discussed.

### 27 273 **General and physical symptoms**

28 274 Four longitudinal studies analysed the relationship between work-time reduction and a broad spectrum of general and  
29 275 physical symptoms. Åkerstedt et al.<sup>24</sup> found a significant improvement of hearth/respiratory symptoms in the experimental  
30 276 group compared to the control group. However, when self-rated health was explored as an outcome, they did not find any  
31 277 statistically significant differences before and after the intervention, neither between the experimental and the control  
32 278 group, nor over time among the same group. Similar results were obtained by von Thiele et al., which did not find any  
33 279 significant differences between the intervention and the reference group regarding neither general symptoms nor self-  
34 280 rated health<sup>20</sup>. As the Authors suggest, the lack of significant results could be explained by the fact that the study was  
35 281 carried out on healthy subjects, consequently reducing the effect size, especially for self-ratings. On the other hand,  
36 282 Lorentzon et al. found an improvement in perceived health in the intervention group compared to the control group<sup>23</sup>.  
37 283 Wergeland et al., in their three-project study, found a significant reduction of neck/shoulder and back pain prevalence in  
38 284 the intervention group<sup>22</sup>, in agreement with Lorentzon et al.<sup>23</sup>, possibly due to a reduction of time spent in the sitting  
39 285 position during work-time.

40 286 Data are still contradictory and it is possible to hypothesize that the real impact of workload reduction on general and  
41 287 physical symptoms, despite having a possible effect on specific physical symptoms, remains to be determined through  
42 288 further larger studies.

### 43 289 **Neuro-psychological symptoms**

1  
2  
3 289 Four studies evaluated the relationship between work-time reduction and neuro-psychological symptoms<sup>18,19,23,24</sup>. General  
4 290 stress was the most frequently explored outcome. Barck-Holst et al. found an average stress level and a stress index  
5 291 significantly decreased in the intervention group, but this difference was higher on workdays compared to weekends<sup>18</sup>.  
6 292 This is consistent with the results of Schiller et al., who found a significant reduction of stress both during the day and at  
7 293 bedtime in the intervention group<sup>19</sup>. Lorentzon et al. found that workers with reduced work-time reported satisfactory  
8 294 levels of stress and perceived fatigue more often in comparison with workers in the control group<sup>23</sup>. Åkerstedt et al. found  
9 295 a significant reduction of mental fatigue in the experimental group<sup>24</sup>. In addition, they found a reduction of nervous  
10 296 symptoms and pain/ache complaints over time, but this difference was not significant between the experimental and the  
11 297 control group. As the authors suggest, the project in itself may have increased the awareness of work organization and  
12 298 health, with positive effects on both groups<sup>24</sup>.

13 299 Globally, these results suggest that the reduction of work-time is associated with a significant improvement in stress and  
14 300 other neuro-psychological symptoms, probably due to the decrease of workload and the consequent increase of free time  
15 301 for leisure activities.

### 22 302 **Sleep**

23 303 Sleep condition was evaluated in five studies<sup>18-20,23,24</sup>. Åkerstedt et al. and Schiller et al. measured subjective sleep quality  
24 304 (SSQ) using the same items and improvements were observed significantly more in the intervention group than in the  
25 305 reference group<sup>19,24</sup>. Similar results were reported by Barck-Holst et al.<sup>18</sup>. In their study on nurses, Lorentzon et al. found  
26 306 that those nurses working less hours as a part of the experiment averagedly slept more than nurses who kept working with  
27 307 regular hours<sup>23</sup>. von Tiele et al. evaluated the presence of sleep disturbances as part of a more comprehensive questionnaire  
28 308 - a modified version of QPSNordic - investigating general symptoms<sup>20,25</sup>. Although they found no improvements in the  
29 309 experimental group regarding general symptoms, we cannot tell whether the occurrence of sleep disturbances taken alone  
30 310 differed among their participants. Despite different measurements being adopted, almost all studies found a significant  
31 311 improvement in sleep among intervention groups compared to control groups. As already reported by previous research,  
32 312 long working hours have shown to negatively influence sleep in many ways<sup>26,27</sup> and this effect may be explained by higher  
33 313 work demands and work-related stress<sup>28</sup>. Thus, we hypothesize that the positive effects of reduced work-time on stress  
34 314 and workload may explain the positive effects on sleep.

### 40 315 **Quality of working life**

41 316 All studies except one investigated whether reduced work hours had measurable effects on working life quality<sup>18-20,22-24</sup>.  
42 317 Åkerstedt et al. found no effects on work demands, but workload had decreased for both intervention and control group<sup>24</sup>.  
43 318 As hypothesized by the authors, it is possible that an increased awareness of work organization following the experiment  
44 319 may be the cause of such findings<sup>24</sup>. No effects on sickness absence were found, as opposed to von Tiele et al., where  
45 320 employees in the intervention group decreased frequency and number of days of sickness absence, as well as perceiving  
46 321 improved self-rated work ability<sup>21</sup>. Other work-related factors were reported as significantly improved after the  
47 322 experiment, including exhaustion after work, sense of collaboration between colleagues, demands, instrumental manager  
48 323 support and work intrusion on private life<sup>18,22,23</sup>. The last finding is in line with results from Anntila et al., in which shorter  
49 324 working hours were associated with positive work-family interaction<sup>29</sup>. Overall, reduced working hours seem to improve  
50 325 working-life quality.

### 56 326 **Quality of life**

57 327 Three studies evaluated the effect of work-time reduction on quality of life outside of work<sup>20,23,24</sup>. Åkerstedt et al. found  
58 328 a significant increase in time for family/friends and social activities in the experimental group, and this increase was  
59 329 significant also over time among the experimental group<sup>24</sup>. However, as mentioned above, they did not find any

1  
2  
3 330 improvement in the self-rated health. It is possible that the extra free time, despite exerting a positive effect on general  
4 331 quality of life, does not necessarily determine an improvement in self-perceived health. These results are consistent with  
5 332 the results of von Thiele et al., who did not find any significant differences regarding work-time interaction, neither  
6 333 between the intervention groups and the reference group nor over time among the same groups<sup>20</sup>. In addition, Lorentzon  
7 334 et al. found that healthy behaviors, such as healthy eating, did not improve in the intervention group<sup>23</sup>. Overall, these  
8 335 results suggest that work time reduction per se is not necessarily associated with an improvement in the balance between  
9 336 work and private life. Hence, beside work-time reduction, it is also important to focus on how the extra free time is spent,  
10 337 in order to make the reduction in work-time and workload really effective in exerting positive effects on individual health.

#### 11 338 **Physical activity**

12 339 Physical activity was evaluated by three studies<sup>20,23,24</sup>. While Åkerstedt et al. found no significant improvements regarding  
13 340 physical exercise<sup>24</sup>, von Thiele et al and Lorentzon et al observed an increase in physical activity in participants  
14 341 experimenting reduced work hours<sup>20,23</sup>. However, the study design by von Thiele et al. consisted in three groups (physical  
15 342 activity group, reduced work hours group and reference group) and such increases were observed in all of them<sup>20</sup>. We do  
16 343 not know whether these changes were a consequence of an increased awareness towards physical exercise brought by the  
17 344 experiment. Moreover, the number of studies evaluating this specific outcome are too few. Although previous research  
18 345 has shown that there seems to be an inverse association between work hours and physical activity<sup>30</sup>, for the reasons listed  
19 346 above it cannot be concluded that reduced work hours are associated with increased levels of physical activity. Indeed,  
20 347 we do not know whether employees working for reduced work time would engage their spare time into physical exercise.  
21 348 Hence, more experiments are needed to better determine this subject.

#### 22 349 **Biological markers**

23 350 Only von Thiele et al. evaluated the effect of work-time reduction on several biological markers<sup>20</sup>. They found in the  
24 351 reference group increasing levels of all of the blood lipids. In the reduced work hours group, total cholesterol and HDL  
25 352 had increased significantly, while only total cholesterol had increased significantly in the physical-exercise group.  
26 353 Regarding metabolic measures, glucose showed a significant decrease in the physical-exercise group only, while the  
27 354 waist-to-hip ratio increased in the reduced work hours group. These last findings suggest that the work time reduction  
28 355 alone is not sufficient to exert positive metabolic effects, but it should be associated with other healthy habits in the  
29 356 extra free time outside of work, like physical activity. that. On the other hand, in this study the increase of total  
30 357 cholesterol in the exercise group, without any significant reduction in LDL and waist-to-hip ratio, is unexpected and it  
31 358 could be related to other factors, such as diet, which this study did not analyze. Hence, it is impossible to state that a  
32 359 reduction in work hours has a significant and positive effect on biomarkers and metabolic outcomes, and other studies  
33 360 are therefore necessary to clarify these discrepancies.

#### 34 361 **Strengths and limitations**

35 362 To date, this is the first literature review carried out in English to establish the relationship between reduced work hours  
36 363 and health effects. Furthermore, our review evaluates the effect of reduced working hours on both self-reported and  
37 364 measured health outcomes. Nevertheless, it has some limitations that must be acknowledged. First of all, the studies we  
38 365 included in our analysis were published in Scandinavian countries, traditionally known for placing a high value on work-  
39 366 life balance. Hence, the results of this review are not easily generalizable in other contexts, which could be different from  
40 367 a social, cultural and economic point of view. Furthermore, even taking into account excluded records, few studies  
41 368 addressed the issue of work time reduction, suggesting that, despite emerging as a relevant topic in public debate over the  
42 369 last few years, the issue of worktime reduction has not been studied enough so far. However, our selection could have  
43 370 missed some relevant studies due to language limitations. In addition, three out of seven studies were evaluated as of

1  
2  
3 371 weak quality by the authors. The main reason for this was the impossibility to ensure blinding of both participants and  
4 372 outcome assessors in this kind of studies. Nonetheless all of them had a longitudinal design, over a period of time ranging  
5 373 from 12 up to 36 months. Furthermore, in all studies except two, employment of extra-personnel allowed to prevent a  
6 374 compensatory increase in workload, which could have significantly undermined the effectiveness of worktime reduction.  
7 375 In the end, a great limitation of our review is the remarkable heterogeneity of workers in the seven selected studies.  
8  
9 376 Most of the studies focus on health service workers and this may limit the generalizability of the review to the context of  
10 377 health services that represent a particular work setting with high emotional stress.  
11  
12 378

## 13 378 14 15 379 **CONCLUSIONS**

16 380 Factors affecting health in the workplace are manifold and include organizational, cultural and social aspects. It is not  
17 381 clear whether changes in working hours alone is a robust enough factor that influences "stress" or other health variables  
18 382 in workers.

19 383 However, our review shows that the reduction of work hours is associated with an improvement of sleep habits, lower  
20 384 levels of stress and better working life quality. We did not find a positive influence of work time reduction neither on  
21 385 quality of life outside of work, nor on physical activity. Hence, we can conclude that a reduction of work-hours, with  
22 386 preserved salary and without an increase in total workload, may exert a positive effect on specific health outcomes,  
23 387 especially stress and sleep, but it is also essential to investigate how other work variables such as load, type and  
24 388 organization of work affect the health of the worker. Another important factor that could affect health is how the extra  
25 389 free time is spent. Therefore, further studies are needed to investigate the correlation between different working variables,  
26 390 working time and extra free time with standardized health outcomes in order to evaluate the real impact of working time  
27 391 on workers' health. It is also important to study whether providing prescriptions on how to spend extra free time healthily  
28 392 can improve workers' health. The conflicting results of this review suggest that work time reduction may be truly effective  
29 393 only if it determines a parallel improvement in healthy habits, which can then be main responsible for a real increase of  
30 394 overall health and quality of life.  
31  
32 395

### 33 396 **Data availability**

34 397 All data relevant to the study are included in the article or uploaded as supplementary information.  
35 398

### 36 399 **Competing interests**

37 400 The authors declare that they have no conflict of interest.  
38 401

### 39 402 **Funding**

40 403 This research did not receive any specific grant from funding agencies in the public commercial or not-for-profit sectors.  
41 404

### 42 405 **Ethics Statement**

43 406 For this type of study Ethics Committee approval is not required.  
44 407

### 45 408 **Contributorship Statement**

46 409 The review was conceived by GV, MRG and RS. Data extraction was carried out by GV, AS, DC, SR and EB with  
47 410 support from MRG, FB and RS. Reporting of findings was led by GV and MRG with support from FB and RS. All  
48 411 authors contributed to manuscript preparation and approved the final version.  
49  
50  
51  
52  
53  
54  
55  
56  
57  
58  
59  
60

1  
2  
3 412 **REFERENCES**  
4 413  
5  
6 414

- 7 415 1. OECD. Average usual weekly hours worked on the main job. OECD Employment and Labour Market Statistics  
8 (database). Published 2021. Accessed January 26, 2020.  
9 416 [https://stats.oecd.org/Index.aspx?DataSetCode=AVE\\_HRS](https://stats.oecd.org/Index.aspx?DataSetCode=AVE_HRS)
- 10 417 2. OECD. Average annual hours actually worked per worker. OECD Employment and Labour Market Statistics  
11 (database). Published 2021. Accessed January 26, 2021. <https://stats.oecd.org/Index.aspx?DataSetCode=ANHRS>  
12 418
- 13 419 3. Bannai A, Tamakoshi A. The association between long working hours and health: A systematic review of  
14 epidemiological evidence. *Scand J Work Environ Heal*. 2014;40(1):5-18. doi:10.5271/sjweh.3388  
15 420
- 16 421 4. Kivimäki M, Jokela M, Nyberg ST, et al. Long working hours and risk of coronary heart disease and stroke: A  
17 systematic review and meta-analysis of published and unpublished data for 603 838 individuals. *Lancet*.  
18 2015;386(10005):1739-1746. doi:10.1016/S0140-6736(15)60295-1  
19 423
- 20 424 5. Virtanen M, Jokela M, Madsen IEH, et al. Long working hours and depressive symptoms: Systematic review and  
21 meta-analysis of published studies and unpublished individual participant data. *Scand J Work Environ Heal*.  
22 425 2018;44(3):239-250. doi:10.5271/sjweh.3712  
23 426
- 24 427 6. Rivera AS, Akanbi M, O'Dwyer LC, McHugh M. Shift work and long work hours and their association with  
25 chronic health conditions: A systematic review of systematic reviews with meta-analyses. *PLoS One*.  
26 428 2020;15(4):1-19. doi:10.1371/journal.pone.0231037  
27 429
- 28 430 7. Fagan C, Lyonette C, Smith M, Saldaña-Tejeda A. *The Influence of Working Time Arrangements on Work-Life*  
29 431 *Integration or 'Balance': A Review of the International Evidence.*; 2012.  
30 432
- 31 433 8. Estevao M, Sa F. The 35-Hour Workweek in France: Straightjacket or Welfare Improvement? *Econ Policy*.  
32 434 2008;23. doi:10.1111/j.1468-0327.2008.00204.x  
33 435
- 34 436 9. Fagnani J, Letablier MT. Work and family life balance: The impact of the 35-hour laws in France. *Work Employ*  
35 437 *Soc*. 2004;18(3):551-572. doi:10.1177/0950017004045550  
36 438
- 37 439 10. Bakker AB, Demerouti E. The Job Demands-Resources model: state of the art. *J Manag Psychol*. 2007;22(3):309-  
38 440 328. doi:10.1108/02683940710733115  
39 441
- 40 442 11. Ferdinand P. VW Plan For 4-Day Workweek Is Adopted. *New York Times*. Published online 1993.  
41 443 <https://www.nytimes.com/1993/11/26/business/vw-plan-for-4day-workweek-is-adopted.html>  
42 444
- 43 445 12. Paul K. Microsoft Japan tested a four-day work week and productivity jumped by 40%. *The Guardian*.  
44 446 <https://www.theguardian.com/technology/2019/nov/04/microsoft-japan-four-day-work-week-productivity>.  
45 447 Published 2019.  
46 448
- 47 449 13. Charlotte G-M. A 4-Day Workweek? A Test Run Shows a Surprising Result. *New York Times*.  
48 450 <https://www.nytimes.com/2018/07/19/world/asia/four-day-workweek-new-zealand.html>. Published 2018.  
49 451
- 50 452 14. Brynja O, Bildt C. Arbetstidsförkortning och hälsa: En litteraturgenomgång av befintlig forskning [Reduced  
51 453 working hours and health: a literature review of existing studies]. Published online 2005.  
52 454 [http://nile.lub.lu.se/arbarch/arb/2005/arb2005\\_11.pdf](http://nile.lub.lu.se/arbarch/arb/2005/arb2005_11.pdf)  
53 455
- 54 456 15. Ouzzani M, Hammady H, Fedorowicz Z, Elmagarmid A. Rayyan—a web and mobile app for systematic reviews.  
55 457 *Syst Rev*. 2016;5(1):210. doi:10.1186/s13643-016-0384-4  
56 458
- 57 459 16. EPHPP. Quality assessment tool for quantitative studies. *Eff Public Heal Pract Proj McMaster Univ Toronto*.  
58 460 2010;(1998):1-4. [https://merst.ca/wp-content/uploads/2018/02/quality-assessment-tool\\_2010.pdf](https://merst.ca/wp-content/uploads/2018/02/quality-assessment-tool_2010.pdf)  
59 461
- 60 462 17. Armijo-Olivo S, Stiles CR, Hagen NA, Biondo PD, Cummings GG. Assessment of study quality for systematic

- 1  
2  
3 453 reviews: a comparison of the Cochrane Collaboration Risk of Bias Tool and the Effective Public Health Practice  
4 454 Project Quality Assessment Tool: methodological research. *J Eval Clin Pract.* 2012;18(1):12-18.  
5 455 doi:10.1111/j.1365-2753.2010.01516.x  
6  
7 456 18. Barck-Holst P, Nilsson A, Åkerstedt T, Hellgren C. Reduced working hours and stress in the Swedish social  
8 services: A longitudinal study. *Int Soc Work.* 2017;60(4):897-913. doi:10.1177/0020872815580045  
9 457  
10 458 19. Schiller H, Lekander M, Rajaleid K, et al. The impact of reduced worktime on sleep and perceived stress – A  
11 group randomized intervention study using diary data. *Scand J Work Environ Heal.* 2017;43(2):109-116.  
12 459 doi:10.5271/sjweh.3610  
13 460  
14 461 20. von Thiele Schwarz U, Lindfors P, Lundberg Ui. Health-related effects of worksite interventions involving  
15 physical exercise and reduced workhours. *Scand J Work Environ Heal.* 2008;34(3):179-188.  
16 462 doi:10.5271/sjweh.1227  
17 463  
18 464 21. Von Thiele Schwarz U, Hasson H. Employee self-rated productivity and objective organizational production  
19 levels: Effects of worksite health interventions involving reduced work hours and physical exercise. *J Occup  
20 465 Environ Med.* 2011;53(8):838-844. doi:10.1097/JOM.0b013e31822589c2  
21 466  
22 467 22. Wergeland E, Veiersted B, Ingre M, et al. A shorter workday as a means of reducing the occurrence of  
23 musculoskeletal disorders. *Scand J Work Environ Heal.* 2003;29(1):27-34. doi:10.5271/sjweh.701  
24 468  
25 469 23. Lorentzon B. *23 Månader Med 6 Timmar. Följeforskning Om Försök Med Reducerad Arbetstid.*; 2017.  
26 470  
27 471 24. Åkerstedt T, OLSSON B, INGRE M, Holmgren Caicedo M, Kecklund G. A 6-hour working day--effects on  
28 health and well-being. *J Hum Ergol (Tokyo).* 2001;30:197-202. doi:10.11183/jhe1972.30.197  
29 472  
30 473 25. Dallner M, Elo AL, Gamberale F, et al. Validation of the general nordic questionnaire (QPSNordic) for  
31 psychological and social factors at work. *Nord Counc Minist.* 2000;12.  
32 474  
33 475 26. Virtanen M, Ferrie JE, Gimeno D, et al. Long Working Hours and Sleep Disturbances: The Whitehall II  
34 Prospective Cohort Study. *Sleep.* 2009;32(6):737-745. doi:10.1093/sleep/32.6.737  
35 476  
36 477 27. NAKASHIMA M, MORIKAWA Y, SAKURAI M, et al. Association between long working hours and sleep  
37 problems in white-collar workers. *J Sleep Res.* 2011;20(1pt1):110-116. doi:10.1111/j.1365-2869.2010.00852.x  
38 478  
39 479 28. Åkerstedt T, Fredlund P, Gillberg M, Jansson B. Work load and work hours in relation to disturbed sleep and  
40 fatigue in a large representative sample. *J Psychosom Res.* 2002;53(1):585-588. doi:10.1016/s0022-  
41 3999(02)00447-6  
42 480  
43 481 29. Anttila T, Nätti J, Väisänen M. THE EXPERIMENTS OF REDUCED WORKING HOURS IN FINLAND.  
44 *Community Work Fam.* 2005;8(2):187-209. doi:10.1080/13668800500049704  
45 482  
46 483 30. Bauman AE, Reis RS, Sallis JF, et al. Correlates of physical activity: Why are some people physically active and  
47 others not? *Lancet.* 2012;380(9838):258-271. doi:10.1016/S0140-6736(12)60735-1  
48 484  
49 485  
50

## 51 486 **Figure Legends**

52 487 **Figure 1** Systematic review: selection process. From: Moher D, Liberati A, Tetzlaff J, Altman DG, The PRISMA Group  
53 (2009). Preferred Reporting Items for Systematic Reviews and Meta- Analyses: The PRISMA Statement. *PLoS Med* 6(7):  
54 488 e1000097. doi:10.1371/journal.pmed1000097.  
55 489

56 490  
57  
58 491 **Table 1** Characteristics of the studies included in systematic review.  
59 492  
60



1  
2  
3  
4  
5  
6  
7  
8  
9  
10  
11  
12  
13  
14  
15  
16  
17  
18  
19  
20  
21  
22  
23  
24  
25  
26  
27  
28  
29  
30  
31  
32  
33  
34  
35  
36  
37  
38  
39

Identification

Screening

Eligibility

Included



**Supplemental File 1: search strategies****MEDLINE**

("work"[Mesh] OR "Employment"[Mesh] OR work\* [Tiab] OR "Employment"[Tiab])

AND

("Mental Health"[Mesh] OR "Occupational Health"[Mesh] OR "Quality of Life/psychology"[Mesh] OR "Occupational Diseases"[Mesh] OR "quality of life"[Tiab] OR "stress" [Tiab] OR "Mental Health" [Tiab] OR "Occupational Health" [Tiab] OR "sleep" [Tiab] OR "health" [Tiab] OR "mental disorders" [Tiab] OR "psychological disorders" [Tiab] OR "insomnia" [Tiab] OR "well-being" [Tiab] OR "anxiety" [Tiab] OR "depression" [Tiab] OR "depressive disorder" [Tiab])

AND

("worktime reduction" [Tiab] OR "reduced workhours" [Tiab] OR "reduced working hours" [Tiab] OR "weekly work hours" [Tiab] OR "weekly working hours" [Tiab] OR "shorter workday"[Tiab] OR "6-hour working day" [Tiab] OR "reduced work hours"[Tiab] OR "reduced worktime"[Tiab] OR "work week" [Tiab] OR "workday" [Tiab])

**PsycINFO**

(DE "Work Load" OR DE "Work Scheduling" OR DE "Workplace intervention" OR TI "work" OR AB "work")

AND

(DE "Mental Health" OR DE "Occupational Health" OR DE "Mental Disorders" OR DE "Occupational Stress" OR DE "Quality of life" OR TI "Stress" OR AB "Stress" OR TI "Mental Health" OR AB "Mental Health" OR TI "Occupational Health" OR AB "Occupational Health" OR TI "sleep" OR AB "sleep" OR TI "health" OR AB "health" OR TI "mental disorder\*" OR AB "mental disorders" OR TI "psychological disorders" OR AB "psychological disorders" OR TI "insomnia" OR AB "insomnia" OR TI "well-being" OR AB "well-being" OR TI "anxiety" OR AB "anxiety" OR TI "depression" OR AB "depression" OR TI "depressive disorder" OR AB "depressive disorder")

AND

(TI "worktime reduction" OR AB "worktime reduction" OR TI "reduced workhours" OR AB "reduced workhours" OR TI "reduced working hours" OR AB "reduced working hours" OR TI "weekly work hours" OR AB "weekly work hours" OR TI "weekly working hours" OR AB "weekly working hours" OR TI "shorter workday" OR AB "shorter workday" OR TI "6-hour working day" OR AB "6-hour working day" OR TI "reduced work hours" OR AB "reduced work hours" OR TI "reduced worktime" OR AB "reduced worktime" OR TI "work week" OR AB "work week" OR TI "workday" OR AB "workday")

**EMBASE**

('work'/exp OR work\*:ti,ab,kw OR 'employment'/exp OR 'employment':ti,ab,kw)

AND

('mental health'/exp OR 'occupational health'/exp OR 'quality of life'/exp OR 'occupational disease'/exp OR 'quality of life':ti,ab,kw OR 'stress':ti,ab,kw OR 'Mental Health':ti,ab,kw OR 'Occupational Health':ti,ab,kw OR 'sleep':ti,ab,kw OR 'health':ti,ab,kw OR 'mental disorders':ti,ab,kw OR 'psychological disorders':ti,ab,kw OR 'insomnia':ti,ab,kw OR 'well-being':ti,ab,kw OR 'anxiety':ti,ab,kw OR 'depression':ti,ab,kw OR 'depressive disorder':ti,ab,kw)

AND

('worktime reduction':ti,ab,kw OR 'reduced workhours':ti,ab,kw OR 'reduced working hours':ti,ab,kw OR 'weekly work hours':ti,ab,kw OR 'weekly working hours':ti,ab,kw OR 'shorter workday':ti,ab,kw OR '6-hour working

1  
2  
3 day':ti,ab,kw OR 'reduced work hours':ti,ab,kw OR 'reduced worktime':ti,ab,kw OR 'work week':ti,ab,kw OR  
4 'workday':ti,ab,kw)  
5

6 **WEB OF SCIENCE**  
7

8 (job OR work\*OR Employment)  
9

10 AND  
11

12 ("quality of life" OR "stress" OR "Mental Health" OR "Occupational Health" OR "sleep" OR "health" OR "mental  
13 disorders" OR "psychological disorders" OR "insomnia" OR "well-being" OR "anxiety" OR "depression" OR  
14 "depressive disorder")  
15

16 AND  
17

18 ("worktime reduction" OR "reduced workhours" OR "reduced working hours" OR "weekly work hours" OR "weekly  
19 working hours" OR "shorter workday" OR "6-hour working day" OR "reduced work hours" OR "reduced worktime"  
20 OR "work week" OR "workday")  
21  
22  
23  
24  
25  
26  
27  
28  
29  
30  
31  
32  
33  
34  
35  
36  
37  
38  
39  
40  
41  
42  
43  
44  
45  
46  
47  
48  
49  
50  
51  
52  
53  
54  
55  
56  
57  
58  
59  
60

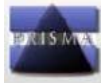

## PRISMA 2020 Checklist

| Section and Topic             | Item # | Checklist item                                                                                                                                                                                                                                                                                       | Location where item is reported |
|-------------------------------|--------|------------------------------------------------------------------------------------------------------------------------------------------------------------------------------------------------------------------------------------------------------------------------------------------------------|---------------------------------|
| <b>TITLE</b>                  |        |                                                                                                                                                                                                                                                                                                      |                                 |
| Title                         | 1      | Identify the report as a systematic review.                                                                                                                                                                                                                                                          | p.1 line 4                      |
| <b>ABSTRACT</b>               |        |                                                                                                                                                                                                                                                                                                      |                                 |
| Abstract                      | 2      | See the PRISMA 2020 for Abstracts checklist.                                                                                                                                                                                                                                                         |                                 |
| <b>INTRODUCTION</b>           |        |                                                                                                                                                                                                                                                                                                      |                                 |
| Rationale                     | 3      | Describe the rationale for the review in the context of existing knowledge.                                                                                                                                                                                                                          | p. 3 lines 97-119               |
| Objectives                    | 4      | Provide an explicit statement of the objective(s) or question(s) the review addresses.                                                                                                                                                                                                               | p. 4 lines 119-121              |
| <b>METHODS</b>                |        |                                                                                                                                                                                                                                                                                                      |                                 |
| Eligibility criteria          | 5      | Specify the inclusion and exclusion criteria for the review and how studies were grouped for the syntheses.                                                                                                                                                                                          | p. 4 lines 135-147              |
| Information sources           | 6      | Specify all databases, registers, websites, organisations, reference lists and other sources searched or consulted to identify studies. Specify the date when each source was last searched or consulted.                                                                                            | p. 4 lines 126-128              |
| Search strategy               | 7      | Present the full search strategies for all databases, registers and websites, including any filters and limits used.                                                                                                                                                                                 | p. 4 lines 128-133              |
| Selection process             | 8      | Specify the methods used to decide whether a study met the inclusion criteria of the review, including how many reviewers screened each record and each report retrieved, whether they worked independently, and if applicable, details of automation tools used in the process.                     | p. 4 lines 128-133              |
| Data collection process       | 9      | Specify the methods used to collect data from reports, including how many reviewers collected data from each report, whether they worked independently, any processes for obtaining or confirming data from study investigators, and if applicable, details of automation tools used in the process. | p. 4 lines 145-147              |
| Data items                    | 10a    | List and define all outcomes for which data were sought. Specify whether all results that were compatible with each outcome domain in each study were sought (e.g. for all measures, time points, analyses), and if not, the methods used to decide which results to collect.                        | p. 11 lines 171-173             |
|                               | 10b    | List and define all other variables for which data were sought (e.g. participant and intervention characteristics, funding sources). Describe any assumptions made about any missing or unclear information.                                                                                         | pp. 10-11 lines 162-171         |
| Study risk of bias assessment | 11     | Specify the methods used to assess risk of bias in the included studies, including details of the tool(s) used, how many reviewers assessed each study and whether they worked independently, and if applicable, details of automation tools used in the process.                                    | pp. 12-13 lines 247-255         |
| Effect measures               | 12     | Specify for each outcome the effect measure(s) (e.g. risk ratio, mean difference) used in the synthesis or presentation of results.                                                                                                                                                                  | pp. 4-12 lines 150-245          |
| Synthesis methods             | 13a    | Describe the processes used to decide which studies were eligible for each synthesis (e.g. tabulating the study intervention characteristics and comparing against the planned groups for each synthesis (item #5)).                                                                                 | p. 4 lines 135-147              |
|                               | 13b    | Describe any methods required to prepare the data for presentation or synthesis, such as handling of missing summary statistics, or data conversions.                                                                                                                                                | N/A                             |
|                               | 13c    | Describe any methods used to tabulate or visually display results of individual studies and syntheses.                                                                                                                                                                                               | p. 5 lines 157-158              |



## PRISMA 2020 Checklist

| Section and Topic             | Item # | Checklist item                                                                                                                                                                                                                                                                       | Location where item is reported |
|-------------------------------|--------|--------------------------------------------------------------------------------------------------------------------------------------------------------------------------------------------------------------------------------------------------------------------------------------|---------------------------------|
|                               | 13d    | Describe any methods used to synthesize results and provide a rationale for the choice(s). If meta-analysis was performed, describe the model(s), method(s) to identify the presence and extent of statistical heterogeneity, and software package(s) used.                          | p. 5 lines 157-158              |
|                               | 13e    | Describe any methods used to explore possible causes of heterogeneity among study results (e.g. subgroup analysis, meta-regression).                                                                                                                                                 | N/A                             |
|                               | 13f    | Describe any sensitivity analyses conducted to assess robustness of the synthesized results.                                                                                                                                                                                         | N/A                             |
| Reporting bias assessment     | 14     | Describe any methods used to assess risk of bias due to missing results in a synthesis (arising from reporting biases).                                                                                                                                                              | N/A                             |
| Certainty assessment          | 15     | Describe any methods used to assess certainty (or confidence) in the body of evidence for an outcome.                                                                                                                                                                                | N/A                             |
| <b>RESULTS</b>                |        |                                                                                                                                                                                                                                                                                      |                                 |
| Study selection               | 16a    | Describe the results of the search and selection process, from the number of records identified in the search to the number of studies included in the review, ideally using a flow diagram.                                                                                         | p. 5 lines 155-157              |
|                               | 16b    | Cite studies that might appear to meet the inclusion criteria, but which were excluded, and explain why they were excluded.                                                                                                                                                          | /                               |
| Study characteristics         | 17     | Cite each included study and present its characteristics.                                                                                                                                                                                                                            | pp. 11-12 lines 174-245         |
| Risk of bias in studies       | 18     | Present assessments of risk of bias for each included study.                                                                                                                                                                                                                         | pp. 5-10 Table 1                |
| Results of individual studies | 19     | For all outcomes, present, for each study: (a) summary statistics for each group (where appropriate) and (b) an effect estimate and its precision (e.g. confidence/credible interval), ideally using structured tables or plots.                                                     | pp. 5-10 Table 1                |
| Results of syntheses          | 20a    | For each synthesis, briefly summarise the characteristics and risk of bias among contributing studies.                                                                                                                                                                               | pp. 5-10 Table 1                |
|                               | 20b    | Present results of all statistical syntheses conducted. If meta-analysis was done, present for each the summary estimate and its precision (e.g. confidence/credible interval) and measures of statistical heterogeneity. If comparing groups, describe the direction of the effect. | N/A                             |
|                               | 20c    | Present results of all investigations of possible causes of heterogeneity among study results.                                                                                                                                                                                       | N/A                             |
|                               | 20d    | Present results of all sensitivity analyses conducted to assess the robustness of the synthesized results.                                                                                                                                                                           | N/A                             |
| Reporting biases              | 21     | Present assessments of risk of bias due to missing results (arising from reporting biases) for each synthesis assessed.                                                                                                                                                              | N/A                             |
| Certainty of evidence         | 22     | Present assessments of certainty (or confidence) in the body of evidence for each outcome assessed.                                                                                                                                                                                  | N/A                             |
| <b>DISCUSSION</b>             |        |                                                                                                                                                                                                                                                                                      |                                 |
| Discussion                    | 23a    | Provide a general interpretation of the results in the context of other evidence.                                                                                                                                                                                                    | pp. 13-15 lines 265-352         |
|                               | 23b    | Discuss any limitations of the evidence included in the review.                                                                                                                                                                                                                      | p. 15 lines 356-369             |
|                               | 23c    | Discuss any limitations of the review processes used.                                                                                                                                                                                                                                | p. 15 lines 361-362             |
|                               | 23d    | Discuss implications of the results for practice, policy, and future research.                                                                                                                                                                                                       | pp. 15-16                       |

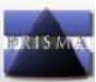

# PRISMA 2020 Checklist

1  
2  
3  
4  
5  
6  
7  
8  
9  
10  
11  
12  
13  
14  
15  
16  
17  
18  
19  
20  
21  
22  
23  
24  
25  
26  
27  
28  
29  
30  
31  
32  
33  
34  
35  
36  
37  
38  
39  
40  
41  
42  
43  
44  
45  
46  
47

| Section and Topic                              | Item # | Checklist item                                                                                                                                                                                                                             | Location where item is reported |
|------------------------------------------------|--------|--------------------------------------------------------------------------------------------------------------------------------------------------------------------------------------------------------------------------------------------|---------------------------------|
|                                                |        |                                                                                                                                                                                                                                            | lines 372-386                   |
| <b>OTHER INFORMATION</b>                       |        |                                                                                                                                                                                                                                            |                                 |
| Registration and protocol                      | 24a    | Provide registration information for the review, including register name and registration number, or state that the review was not registered.                                                                                             | N/A                             |
|                                                | 24b    | Indicate where the review protocol can be accessed, or state that a protocol was not prepared.                                                                                                                                             | N/A                             |
|                                                | 24c    | Describe and explain any amendments to information provided at registration or in the protocol.                                                                                                                                            | N/A                             |
| Support                                        | 25     | Describe sources of financial or non-financial support for the review, and the role of the funders or sponsors in the review.                                                                                                              | p. 16 line 392                  |
| Competing interests                            | 26     | Declare any competing interests of review authors.                                                                                                                                                                                         | p. 16 line 389                  |
| Availability of data, code and other materials | 27     | Report which of the following are publicly available and where they can be found: template data collection forms; data extracted from included studies; data used for all analyses; analytic code; any other materials used in the review. | p.4 line 129                    |

From: Page MJ, McKenzie JE, Bossuyt PM, Boutron I, Hoffmann TC, Mulrow CD, et al. The PRISMA 2020 statement: an updated guideline for reporting systematic reviews. *BMJ* 2021;372:n71. doi: 10.1136/bmj.n71  
 For more information, visit: <http://www.prisma-statement.org/>
